# A command-like descending neuron that coordinately activates backward and inhibits forward locomotion

Arnaldo Carreira-Rosario<sup>1#</sup>, Aref Arzan Zarin<sup>1#</sup>, Matthew Q. Clark<sup>1#^</sup>, Laurina Manning<sup>1</sup>, Richard Fetter<sup>2</sup>, Albert Cardona<sup>2</sup>, and Chris Q. Doe<sup>1\*</sup>

<sup>1</sup>Institute of Neuroscience, Institute of Molecular Biology, Howard Hughes Medical Institute, University of Oregon, Eugene, OR 97403

<sup>2</sup>Janelia Research Campus, Howard Hughes Medical Institute, Ashburn, VA 20147

# These authors contributed equally

^ Current address: Division of Biology and Biological Engineering, California Institute of Technology, Pasadena, CA 91125

\* Author for correspondence at [cdoe@uoregon.edu](mailto:cdoe@uoregon.edu)

Key words: behavioral switching, backward locomotion, crawling, walking, sensorimotor, wave propagation, descending interneuron, aversion, neural circuit, *Drosophila*

## Highlights

- MDN command-like descending neuron induces backward larval locomotion
- MDN neurons coordinately regulate antagonistic behaviors (forward/backward locomotion)
- MDN-motor circuit validated at structural (TEM) and functional (optogenetic) levels
- MDN neurons induce backward locomotion in both limbless larva and limbed adult

## Abstract

Command-like descending neurons can induce many behaviors, such as backward locomotion, escape, feeding, courtship, egg-laying, or grooming. In most animals it remains unknown how neural circuits switch between these antagonistic behaviors: via top-down activation/inhibition of antagonistic circuits or via reciprocal inhibition between antagonistic circuits. Here we use genetic screens, intersectional genetics, circuit reconstruction by electron microscopy, and functional optogenetics to identify a bilateral pair of larval “mooncrawler descending neurons” (MDNs) with command-like ability to coordinately induce backward locomotion and block forward locomotion; the former by activating a backward-specific premotor neuron, and the latter by disynaptic inhibition of a forward-specific premotor neuron. In contrast, direct reciprocal inhibition between forward and backward circuits was not observed. Thus, MDNs coordinate a transition between antagonistic larval locomotor behaviors. Interestingly, larval MDNs persist into adulthood, where they can trigger backward walking. Thus, MDNs induce backward locomotion in both limbless and limbed animals.

44

## 45 **Introduction**

46 Animals typically execute one behavior to the exclusion of all other possible behaviors. For  
47 example, during locomotion, an animal can either move forward or backwards, but cannot do both  
48 simultaneously. The selection of a locomotor program to the exclusion of all others is necessary to  
49 prevent injury and escape predation. Despite the paramount importance of rapid transitions  
50 between antagonistic motor programs, the underlying circuitry is only beginning to be understood  
51 in *C. elegans* (Lindsay et al., 2011; Piggott et al., 2011; Roberts et al., 2016).

52 Command neurons can elicit specific behaviors, such as forward locomotion, backward  
53 locomotion, pausing, escape, flight, grooming, feeding, courtship, egg-laying or sleep (Bidaye et  
54 al., 2014; Bouvier et al., 2015; Hagglund et al., 2010; Hampel et al., 2015; Hedwig, 2000;  
55 Hückesfeld et al., 2015; Kallman et al., 2015; Liu and Fetcho, 1999; Ohyama et al., 2015; Pearson  
56 et al., 1985; Sen et al., 2017; Tanouye and Wyman, 1980; von Philipsborn et al., 2011; Weber et al.,  
57 2015; Wu et al., 2015). However, much less is known about how antagonistic motor programs are  
58 suppressed during command neuron induced behavior. On one hand, there could be a high  
59 degree of reciprocal inhibition between neurons in antagonistic circuits; on the other hand, the  
60 command neurons that activate one behavior may also suppress antagonistic behaviors (in which  
61 case there could be minimal reciprocal inhibition). Here we use the *Drosophila* larva to characterize  
62 the neural circuits coordinately regulating two antagonistic behaviors: forward versus backward  
63 locomotion.

64 *Drosophila* larva have many distinct behaviors (Vogelstein et al., 2014), but forward locomotion  
65 is the default locomotor behavior (Berni et al., 2012) and consists of coordinated posterior-to-  
66 anterior waves of somatic body wall muscle contractions driven by corresponding waves of motor  
67 neuron activity within the segmented ventral nerve cord (VNC) (Clark et al., 2018; Heckscher et al.,  
68 2012; Hughes and Thomas, 2007; Pulver et al., 2015). There are ~35 motor neurons per bilateral  
69 hemisegment, innervating 30 body wall muscles (Landgraf and Thor, 2006), about 250  
70 interneurons per hemisegment (Rickert et al., 2011), and an unknown number of ascending and  
71 descending neurons traversing each segment of the VNC. The circuits for motor wave propagation  
72 (Fushiki et al., 2016), the coordination of muscle groups within each segment (Zwart et al., 2016),  
73 and the bilateral adjustment of muscle contraction amplitude (Heckscher et al., 2015) have been  
74 recently investigated; however, much less is known about the circuits promoting backward  
75 locomotion, or the switching from forward to backward locomotion.

76 Larvae initiate backward locomotion upon encountering a barrier or experiencing mild noxious  
77 stimulation to the anterior body (Kernan et al., 1994; Robertson et al., 2013; Takagi et al., 2017;  
78 Titlow et al., 2014; Tracey et al., 2003). Backwards locomotion consists of anterior-to-posterior  
79 waves of motor neuron and muscle activity (Heckscher et al., 2012; Pulver et al., 2015). A  
80 segmentally-reiterated VNC neuron that triggers backward locomotion has been identified (Takagi  
81 et al., 2017), but high-order command neurons for backward locomotion and the circuit for

82 executing backwards wave propagation while simultaneously suppressing forward waves remain  
83 unknown.

84 Here, we identify a bilateral pair of *Drosophila* brain descending neurons that coordinately  
85 activate backward locomotion and suppress forward locomotion, and identify the downstream  
86 pre-motor circuitry effecting the switch. Surprisingly, immortalization of CsChrimson (Chrimson)  
87 expression in these larval command-like neurons reveals that they survive metamorphosis, have  
88 the exact morphology of previously described adult "moonwalker" neurons (Bidaye et al., 2014),  
89 and can induce backward walking in the adult. By analogy to the adult naming scheme, we refer to  
90 these larval brain neurons as "mooncrawler descending neurons" (MDNs). We reconstruct the  
91 larval MDNs in an electron microscopy volume comprising the whole central nervous system  
92 (Ohyama et al., 2015), in which we also map its postsynaptic neuron partners. We identify the  
93 circuit motifs by which MDNs induce backward locomotion while simultaneously suppressing  
94 forward locomotion. The MDNs project their axons along the length of the nerve cord, where they  
95 directly activate an excitatory cholinergic pre-motor neuron (A18b) that is specifically active during  
96 backward waves. In parallel, the MDNs synapse onto a GABAergic inhibitory neuron (Pair1) that  
97 directly inhibits cholinergic pre-motor neurons (A27h) active specifically during forward locomotion  
98 (Fushiki et al., 2016); optogenetic experiments showed that MDNs activate Pair1 neurons, which  
99 then inhibit A27h and block forward locomotion. The circuit structure therefore suggests that two  
100 behaviors such as forward and backward peristaltic locomotion can maintain mutually exclusive  
101 activity due to top-down excitation/inhibition, rather than reciprocal inhibition. We conclude that  
102 the MDNs promote backward locomotion at all stages of the *Drosophila* life cycle: from the  
103 limbless crawling maggot to the limbed walking adult.

## 104 105 **Results**

### 106 107 **Identification of brain neurons sufficient and necessary for larval backward locomotion**

108 We previously showed that activating neurons labeled by the *Janelia* R53F07-Gal4 line  
109 could induce backward larval locomotion, but this line has broad expression in the brain,  
110 subesophageal zone (SEZ), and both motor neurons and interneurons of the VNC (Clark et al.,  
111 2016). To identify the neurons within this population that can induce backward locomotion, we  
112 used intersectional genetics (Dolan et al., 2017; Luan et al., 2006) to find lines labeling small  
113 subsets of the original population. We identified three lines called Split1, Split2, and Split3  
114 labeling different subsets of the original pattern; the only neurons present in all three Split lines  
115 are a bilateral pair of neurons with cell bodies located in the ventral, anterior, medial brain with  
116 descending processes to A3-A5 in the VNC (**Figure 1A-C**, arrowheads).

117 All three Split lines could induce backward locomotion following Chrimson expression and  
118 activation (**Figure 1D**, **Movie 1**). Neuronal activation immediately switched locomotion from  
119 forward to backward (**Figure 1E,F**), without a significant change in the number of peristaltic

120 waves per second (Split1, 0.48; Split2, 0.50; Split3, 0.65 before activation; Split1, 0.48; Split2,  
121 0.56; Split3, 0.56 after activation). Conversely, using Split2 or Split3 to express the light-  
122 inducible neuronal silencer GtACR1 (Mohammad et al., 2017) significantly reduced backward  
123 locomotion induced by a noxious head poke (**Figure 1G,H**). It is likely that these activation and  
124 silencing phenotypes arise from the pair of ventral, anterior, medial brain descending neurons  
125 common to all three lines, although it is possible that there are different neurons in each Split  
126 line that can induce backward locomotion. We distinguish between these alternatives in the  
127 next section.

### 128 129 **A single pair of brain neurons can induce a switch from forward to backward locomotion**

130 To determine whether Chrimson expression in just one or two of the ventral, anterior,  
131 medial brain neurons is sufficient to induce backwards locomotion, we stochastically  
132 expressed Chrimson:Venus within the Split2 pattern via the “FLP-out” method (**Figure 2A**). We  
133 screened populations of larvae for Chrimson-induced backward locomotion (obtaining 1-2  
134 larvae per 100 screened), and stained the CNS to identify the Chrimson:Venus<sup>+</sup> neurons that  
135 were sufficient to induce backward locomotion. All larvae with a backward locomotion  
136 phenotype (n=10) expressed Chrimson:Venus in one or both neurons from the anterior, medial  
137 pair that had descending projections to A3-A5 (three examples shown in **Figure 2B-D**).  
138 Conversely, all larvae that lacked Chrimson-induced backward locomotion (n=20) never  
139 showed Chrimson:Venus expression in the ventral, anterior, medial descending neurons (data  
140 not shown). Based on similarity to the “moonwalker” neuron adult backward walking  
141 phenotype (Bidaye et al., 2014), we name this bilateral pair of neurons the “mooncrawler”  
142 descending neurons (MDNa and MDNb), subsequently called MDNs. The MDNs are likely to be  
143 excitatory, as they are cholinergic (**Figure 2E**). We conclude that activation of as few as two of  
144 the four MDNs (either both in the same brain lobe or one in each brain lobe) is sufficient to  
145 induce a behavioral switch from forward to backward locomotion.

146 If forced activation of MDNs can induce backward locomotion, perhaps the MDNs are  
147 normally active specifically during backward locomotion. To test this hypothesis, we used  
148 CaMPARI to monitor MDN activity during forward versus backward locomotion within the  
149 intact crawling larva. CaMPARI undergoes an irreversible green-to-red conversion upon  
150 coincident exposure to elevated Calcium (i.e. neuronal activity) and 405nm illumination (Fosque  
151 et al., 2015). We used Split2 to express CaMPARI in MDNs and exposed crawling larvae to  
152 405nm illumination for 30 sec during either backward or forward locomotion. We detected little  
153 or no activity-induced red fluorescence during forward locomotion, but significant red  
154 fluorescence during backward locomotion (**Figure 2F**). Note that not all backward crawling  
155 larvae activate MDN; we return to this point below. We conclude that MDNs are active during  
156 backward but not forward locomotion.

157

## 158 **Identification of MDNs in a serial section TEM reconstruction of the larval CNS**

159 To understand how MDNs induce backward locomotion, we next identified the MDN  
160 synaptic partners. To do this, we identified the MDNs in an existing serial section TEM  
161 reconstruction of the newly hatched larva (Ohyama et al., 2015). Our first step was to  
162 determine the precise morphology of both MDN neurons. We generated individually labeled  
163 neurons within the Split2 pattern using MultiColor FlipOut (MCFO) (Nern et al., 2015). These  
164 single neurons serve as the "ground truth" for matching morphological features of individual  
165 neurons by light and electron microscopy (Heckscher et al., 2015; Schneider-Mizell et al.,  
166 2016). We identified single MDNs in Split2 MCFO preparations based on morphological  
167 similarity to the behavior flip-out neurons described in **Figure 2**. Diagnostic features shared by  
168 both MDNs in the pair include ventral, anterior, medial somata, distinctive ipsilateral and  
169 contralateral arbors, a contralateral projection in the posterior commissure, and descending  
170 neurons terminating in segments A3-A5 of the VNC (**Figure 3A-E**). Both MDNs have  
171 descending axons that run slightly lateral to the dorsal medial FasII<sup>+</sup> bundle (Landgraf et al.,  
172 2003)(**Figure 3F**). Each neuron in the pair share all of these features, as well as common inputs  
173 and outputs (see below), but the two MDNs can be distinguished from each other by their  
174 ipsilateral arbor, which is either linear (**Figure 3C**, arrow) or bushy (**Figure 3D**, arrowhead). We  
175 next searched for the MDNs in the TEM volume using CATMAID (Schneider-Mizell et al., 2016).  
176 We found two pair of neurons that showed an excellent morphological match to the MDNs in  
177 every distinctive feature (**Figure 3A'-D'**); we annotate them as MDNa and MDNb in the TEM  
178 volume. Hereafter we call these neurons simply MDNs due to their similarity in morphology and  
179 connectivity (see next section). Importantly, none of the 50 neurons with cell bodies nearest to  
180 the MDNs have a similar morphology (data not shown). Thus, we can be certain that the MDNs  
181 in the TEM reconstruction are identical to the MDNs visualized by our Split-gal4 lines. This is  
182 also confirmed by functional optogenetics (see below). We conclude that the MDNs can be  
183 uniquely identified by light microscopy and by TEM. Identification of the MDNs in the TEM  
184 volume is a prerequisite for identifying their pre- and post-synaptic partners (next section).

185

## 186 **The MDN circuit: three pathways to distinct premotor neurons**

187 Annotation of the MDNs in the TEM reconstruction revealed bilateral arbors in the brain and  
188 descending processes to abdominal segments (**Figure 4A**). Pre-synapses are restricted to the  
189 descending processes (**Figure 4A, green**), whereas post-synapses are present in brain arbors  
190 and descending processes, suggesting information flow from brain to VNC. A representative  
191 MDN output synapse shown in **Figure 4B**; it is polyadic (multiple postsynaptic neurons  
192 clustered around the MDN pre-synapse) and electron dense with associated presynaptic  
193 vesicles.

194 Due to the ability of the MDNs to induce backward locomotion when activated, we focused  
195 on identifying MDN post-synaptic partners, with the goal of understanding the relationship  
196 between the MDN activation and motor output. The post-synaptic partners with the most  
197 synapses with MDN are: (1) the Pair1 SEZ descending neuron; (2) the thoracic descending  
198 neuron (ThDN); (3) the premotor neuron A18b; and (4) the MDNs themselves (**Figure 4C-D**).  
199 These are the top four MDN partners in both synapse number (**Figure 4C**) and percentage of  
200 total MDN output synapses (**Figure 4D**). All four MDNs have similar connectivity ([Supplement  
201 to Figure 4](#)). All of the top MDN output neurons are either premotor neurons or have  
202 preferential input into known premotor neurons (**Figure 4D-G**). For example, ThDN is strongly  
203 connected to A27I/A27k premotor neurons (**Figure 4C,E,H**), as well as to A18g which is not a  
204 premotor neuron. Pair1 is strongly connected to the previously described premotor neuron  
205 A27h (Fushiki et al., 2016), both directly and indirectly (**Figure 4C,F,J**). Lastly, A18b is a  
206 premotor neuron present in all abdominal segments, but it only receives MDN input in segment  
207 A1 (**Figure 4C,I**). Thus, the strongest output of the MDNs provides mono- and di-synaptic  
208 connectivity to premotor neurons. The activity and function of the MDN-A18b and MDN-Pair1  
209 pathways in locomotion will be addressed below; we lack genetic tools to investigate the  
210 MDN-ThDN pathway.

211 There are numerous MDN inputs (an average of 396 post-synapses per MDN neuron) and  
212 we have not attempted to reconstruct them; this is beyond the scope of a single paper.  
213 However, we note that each MDN has similar inputs. We do not detect mono-synaptic sensory  
214 input into the MDNs (data not shown), but based on the requirement for MDNs to generate a  
215 backward crawl in response to a noxious head touch, we predict that there will be, minimally,  
216 polysynaptic connections from head mechanoreceptors to the MDNs.

217

### 218 **MDNs activate A18b, a backward-active premotor neuron**

219 The MDNs show anatomical connectivity to the A18b premotor neuron, which has not  
220 previously been characterized. We identified a LexA line that labels A18b within the VNC  
221 (R94E10, subsequently called A18b-LexA) along with a small, variable number of brain and  
222 thoracic neurons ([Supplement to Figure 5](#)). A18b has local, contralateral projections that match  
223 the morphology of A18b in the TEM reconstruction (**Figure 5A**), is cholinergic (**Figure 5B**), and  
224 is connected directly to the dorsal-projecting motor neurons aCC/RP2 and U1/U2 (**Figure 5C**)  
225 among other motor neurons.

226 We showed above that MDNs are significantly more active during backward than forward  
227 locomotion, raising the question of whether the A18b neurons are also preferentially active  
228 during backward locomotion. To answer this question, we performed three experiments. First,  
229 we used dual color calcium indicators in a fictive CNS preparation to simultaneously monitor  
230 motor neuron activity (GCaMP6m) and A18b activity (jRCaMP1b). We observed robust forward

231 and backward motor waves (**Figure 5D, top**), with A18b only active during backward motor  
232 waves, not forward motor waves (**Figure 5D, bottom**). Second, we performed dual color  
233 calcium imaging within intact larvae, and again observed that A18b was only active during  
234 backward motor waves (**Figure 5E**). Third, we used CaMPARI within intact larvae to determine  
235 if A18b was preferentially active during backward locomotion. We expressed CaMPARI in A18b  
236 and tested for activity-induced green-to-red photoconversion during either forward or  
237 backward locomotion. We found that illumination during forward locomotion generated minimal  
238 CaMPARI red fluorescence, whereas illumination during backward locomotion resulted in a  
239 significant increase in CaMPARI red fluorescence (**Figure 5F**). We call the A18b neuron  
240 backward-active rather than backward-specific because we do not know its pattern of activity  
241 in rolling or other larval behaviors. We conclude that A18b neurons are preferentially active  
242 during backward not forward locomotion.

243 To determine if MDNs activate A18b, we used Split1 to express Chrimson in MDNs and  
244 A18b-lexA to express GCaMP6f in A18b in fictive preparations. MDN stimulation led to a  
245 significant increase in GCaMP6f fluorescence in A18b, and this was not observed in controls  
246 lacking all-*trans* retinal (ATR), an essential co-factor for Chrimson function (**Figure 5G**).  
247 Interestingly, MDN activation triggered a backward wave of A18b activity from A2 to A6 (**Figure**  
248 **5G**). We propose that MDN activates A18b in segment A1, which is the only segment we  
249 detect direct synaptic contacts, and this is transformed into an anterior-to-posterior wave of  
250 A18b activity.

251 We showed above that A18b has direct synaptic connectivity to motor neurons and is  
252 cholinergic, indicating that is likely to be an excitatory pre-motor neuron. Consistent with this  
253 expectation, we observed co-activity of A18b and motor neurons during backward motor  
254 waves in fictive preparations (**Figure 5H**), and found that A18b stimulation led to a significant  
255 increase in GCaMP6f fluorescence in motor neurons, which was not observed in controls  
256 lacking ATR (**Figure 5I**).

257 We wanted to test whether activation of A18b in segment A1 could induce backward  
258 waves of motor neuron activity. Unfortunately, the A18b-Gal4 line is not expressed in A1,  
259 precluding this experiment; moreover, it has “off-target” expression in the brain and in the  
260 VNC; these off-target neurons don’t prevent monitoring A18b activity because they don’t  
261 overlap with A18b arbors, but they make it impossible to selectively activate or silence A18b. In  
262 conclusion, our data support the following model: MDN activates A18b in segment A1, which  
263 initiates a coordinated anterior-to-posterior wave of A18b/motor neuron activity that drives  
264 backward locomotion.

265

266 **MDNs activate Pair1, a backward-active descending interneuron**

267       Connectomic data shows that MDNs are strongly connected to the bilateral Pair1 neurons,  
268 which send a descending projection to the VNC where they form synapses with A27h in  
269 posterior abdominal segments. A27h neurons are only active during forward locomotion  
270 (Fushiki et al., 2013). This leads to the hypothesis we test below: MDNs activate Pair1 to inhibit  
271 A27h, which terminates forward locomotion.

272       To determine if MDNs activate Pair1 we used Split1 to express Chrimson in MDNs, and  
273 R72C02-lexA (hereafter Pair1-lexA) (**Figure 6A**) to express GCaMP6f specifically in Pair1.  
274 Stimulation of MDNs led to a significant increase in Pair1 GCaMP6f fluorescence, and this was  
275 not observed in controls lacking ATR (**Figure 6B**). We conclude that the MDNs activate Pair1  
276 neurons. In addition, we observed that every time MDNs were active, the Pair1 neurons were  
277 co-active (n=5; **Figure 6C**), although Pair1 could be active alone (n=5; [Supplement to Figure 6](#)).  
278 We conclude that MDNs activate the Pair1 neurons, and that other mechanisms exist for  
279 activating Pair1 as well.

280       We next used two methods to determine whether Pair1 neurons are preferentially active  
281 during backward locomotion. First, we used GCaMP6m to simultaneously monitor Pair1 and  
282 motor neuron activity in a fictive CNS preparation; this is possible because Pair1 and motor  
283 neuron processes are in different positions within the neuropil. These preparations show  
284 rhythmic forward and backward waves of motor neuron activity, and Pair1 neurons were only  
285 active during backward waves (100%, n=7 brains from which 53 backward waves were  
286 recorded; **Figure 6D**). Second, we expressed CaMPARI in Pair1 neurons and performed  
287 photoconversion during forward or backward locomotion. We found that illumination during  
288 forward locomotion generated a small amount of red fluorescence, whereas illumination during  
289 backward locomotion resulted in a significant increase in red fluorescence (**Figure 6E**). Taking  
290 all our anatomical and functional data together, we conclude that MDNs activate the A18b and  
291 the Pair1 neurons, which are both active specifically during backward but not forward  
292 locomotion.

293

### 294 **Pair1 inhibits the A27h premotor neuron, arrests forward locomotion, and facilitates** 295 **MDN-mediated backward locomotion**

296       We confirm previous work showing that A27h is active during forward not backward  
297 locomotion (Fushiki et al., 2016)([Supplement to Figure 7A,B](#)). This raises the interesting  
298 possibility that the MDNs coordinately switch locomotor behavioral states: concurrently  
299 promoting backward locomotion via A18b, and suppressing forward locomotion via Pair1  
300 inhibition of A27h.

301       To test whether Pair1 inhibits the A27h neuron, we expressed Chrimson in Pair1 and  
302 GCaMP6m in A27h. We used Chrimson to stimulate Pair1 just as A27h activity was rising as  
303 part of a forward motor wave, and observed a significant decrease in A27h GCaMP6m  
304 fluorescence; this was not observed in controls lacking ATR (**Figure 7A,B**). Furthermore, we



305 found that Pair1 neurons are GABAergic (**Figure 7A**”), consistent with Pair1 direct repression  
306 of A27h activity. In addition, we found that Chrimson stimulation of Pair1 immediately and  
307 persistently blocked forward larval locomotion; control larvae lacking ATR briefly paused in  
308 response to illumination but rapidly resumed forward locomotion (**Figure 7C**; **Movie 2**).  
309 Consistent with an inhibitory relationship, we observed that Pair1 and A27h are not co-active  
310 (**Supplement to Figure 7**). We conclude that activation of the GABAergic Pair1 neurons inhibit  
311 A27h and prevent forward locomotion.

312 Our results suggest that Pair1 suppression of forward locomotion may be an essential  
313 component of MDN triggering a switch from forward to backward locomotion. If so, silencing  
314 Pair1 activity should reduce the effectiveness of MDN-induced backward locomotion;  
315 alternatively, MDN may be able to induce backward locomotion equally well without Pair1  
316 function. Thus, we expressed Chrimson in MDNs and the neuronal silencer Shibire<sup>ts</sup> in Pair1;  
317 Shibire<sup>ts</sup> blocks vesicle release at 32°C but not at 25°C (experiment summarized in **Figure 7D**).  
318 We observed that silencing Pair1 alone had no effect on forward locomotion (**Figure 7E**, i-ii),  
319 but silencing Pair1 prior to low light or high light Chrimson-induced activation of MDN led to a  
320 loss in the effectiveness of MDN-induced backward locomotion (**Figure 7E**, iii-vi). We conclude  
321 that MDN triggers robust backward locomotion by coordinately activating the backward  
322 locomotion program and suppressing the forward locomotion program; we find no evidence for  
323 direct reciprocal inhibition between these pathways (**Supplement to Figure 7D**).  
324

### 325 **MDNs persist through metamorphosis and induce backward walking in adults**

326 Larval MDNs share several features with the moonwalker descending neurons  
327 characterized in the adult (Bidaye et al., 2014; Sen et al., 2017). Both larval and adult neurons  
328 have anterior, medial somata with ipsilateral and contralateral arbors, and descending  
329 projections into the VNC. Both have presynaptic output into the SEZ and VNC. Could they be  
330 the same neurons? We tried to trace the MDNs through pupal stages using the Split1-Gal4 and  
331 observed the MDNs at early pupal stages (**Figure 8A**) and mid-pupal stages, where they began  
332 to prune their dendritic arbors (**Figure 8B**). However, Split1 was down-regulated by adulthood  
333 (data not shown), requiring us to use alternate methods to follow the larval MDNs into  
334 adulthood.

335 To permanently mark the larval MDN neurons, trace their morphology and test their gain of  
336 function phenotype in the adult brain, we used two distinct intersectional genetic methods.  
337 First, we generated an intersection between a larval MDN line and an adult MDN line to express  
338 the optogenetic activator ReaChr (genetics schematized in **Figure 8C**). If the larval MDNs  
339 become adult moonwalker neurons, they will express ReaChr:citrine and show light-induced  
340 backward walking. We observed light-induced backward walking in eight of ten adult flies  
341 assayed (**Figure 8D**; **Movie 3**); all eight had ReaChr::citrine expression in neurons matching the

342 moonwalker neuron morphology (**Figure 8E,F**), whereas the two flies that did not walk  
343 backward also did not have ReaChr:citrine expression in moonwalker neurons (data not shown).

344 Second, we used ‘immortalization’ genetics (Harris et al., 2015) to permanently mark larval  
345 MDNs and assay their function in the larva and adult (genetics schematized in **Figure 8G**). We  
346 used Split1 to express an RU486-inducible FLP recombinase (hPR:FLP), allowing us to  
347 chemically induce FLP activity in first instar larva when Split1 is only expressed in the MDNs  
348 and a few off-targets. FLP activity resulted in permanent expression of *lexA* in the MDN  
349 neurons, which immortalizes expression of *LexAop-Chrimson:Venus* in these neurons. We  
350 identified larvae that crawled backward in response to Chrimson activation, and all grew into  
351 adults that showed Chrimson-induced backward walking (n=20; **Figure 8H**). Importantly, all of  
352 the backward walking adults that were successfully stained showed expression in the adult  
353 moonwalker neurons (n=5; **Figure 8I,I'**); although each brain showed staining in a few  
354 additional neurons (blue shading), only the MDNs were present in all of the brains.

355 We conclude that the larval MDNs are descending neurons that are born embryonically,  
356 persist throughout larval stages, and survive into the adult. Surprisingly, activation of MDNs can  
357 induce backward crawling in the limbless larva, as well as backward walking in the six-limbed  
358 adult (**Figure 9A**). How much of the MDN larval circuitry persists into the adult is an interesting  
359 open question (see Discussion).

360

## 361 Discussion

362

363 We have shown that MDNs are brain descending interneurons that activate two neuronal  
364 pathways: one to stop forward locomotion, and one to induce backward locomotion (**Figure**  
365 **9B,C**). This is similar to *C. elegans*, where in response to a head poke the ASH sensory neuron  
366 activates AVA, a command neuron for backward locomotion (Lindsay et al., 2011), and  
367 indirectly inhibits AVB, a command neuron for forward locomotion (Roberts et al., 2016),  
368 although AVB inhibition may arise from reciprocal inhibition between AVA and AVB. It is also  
369 similar to the role of the eighth nerve in simultaneously exciting the ipsilateral Mauthner neuron  
370 while inhibiting, via a feed-forward inhibitory neuron, the contralateral Mauthner neuron  
371 (Koyama et al., 2016). Our results raise the question of whether previously described  
372 command-like neurons in *Drosophila* (Bidaye et al., 2014; King and Wyman, 1980; Sen et al.,  
373 2017), leech (Kristan, 2008), lamprey (Dubuc et al., 2008), zebrafish (Kimura et al., 2013; Medan  
374 and Preuss, 2014), mouse (Bouvier et al., 2015; Grillner and El Manira, 2015; Hagglund et al.,  
375 2010; Jordan et al., 2008; Juvin et al., 2016; Roberts et al., 2008) and other animals may not  
376 only induce a specific behavior, but concurrently inhibit an antagonistic behavior.

377 MDNs are required for backwards locomotion in response to mild noxious touch to the  
378 head. It is unclear how the tactile sensory cue is transduced to the MDNs: we find no direct  
379 sensory inputs to the MDNs in the current TEM connectome (data not shown). It is also

380 unknown whether MDNs are required for backward crawling in response to other noxious  
381 sensory modalities, such as high salt, bright light, or bitter taste. MDNs may be dedicated to  
382 responding to noxious mechanosensation, or they may integrate multimodal inputs to initiate  
383 backward locomotion.

384 The discovery of MDN command-like neurons that switch locomotion from forward to  
385 backward raises the question: are there command-like neurons that induce the opposite  
386 transition: from backward to forward locomotion? Whereas the MDN descending projection  
387 extends to A3-A5, and thus well past the thoracic and upper abdominal segments that initiate  
388 backwards locomotion (Berni, 2015; Heckscher et al., 2012; Pulver et al., 2015), a descending  
389 command-like neuron that induces forward locomotion is likely to project into the posterior  
390 abdominal segments, where forward waves are initiated (Berni, 2015; Heckscher et al., 2012;  
391 Pulver et al., 2015). Exploring the function of the latter type of descending neuron would help  
392 answer this question, as would the characterization of inhibitory inputs into the Pair1 or A18b  
393 backward-active neurons.

394 Our model is that activation of A18b in A1 induces backward locomotion. This model is  
395 based on several observations. (1) A18b is only active during backward locomotion. (2) MDN  
396 forms excitatory synapses on A18b in A1 but not more posterior segments. (3) Stimulation of  
397 MDN produces an A18b backward activity wave. (4) The A18b backward wave is always  
398 concurrent with a motor neuron backward wave. Unfortunately, we are unable to directly test the  
399 function of A18b in triggering backward locomotion due to the A18b Gal4 line having off-target  
400 expression in the brain and in the VNC, and lacking expression in A1 or thoracic segments  
401 ([Supplement to Figure 5](#)). Backward motor waves are initiated from the thorax (Pulver et al.,  
402 2015), and it is likely that stimulation of A18b in A1 or thoracic segments would be required to  
403 induce a backward motor wave. In support of this notion, the A02o “wave” neuron can only  
404 induce backward motor waves following stimulation in anterior abdominal segments (Takagi et  
405 al., 2017). The relationship between A18b and A02o is unclear (they are not directly connected),  
406 nor is it known how activation of either produces a backward motor wave. This level of  
407 understanding would require a comprehensive anatomical and functional analysis of larval  
408 premotor and motor circuits.

409 We propose that MDNs directly excite Pair1 neurons to halt forward locomotion. But  
410 there are also additional mechanisms to induce Pair1 activity, as many Pair1 activity bouts  
411 occur without MDN activity. It appears that backward locomotion can be induced via MDN-  
412 dependent or -independent pathways, and both show correlated Pair1 activity. The inputs in  
413 addition to MDN that activate Pair1 during backward locomotion remain to be discovered.

414 The least understood MDN output to motor neurons is the MDN-ThDN-A27k/l pathway.  
415 A27l is inhibitory (AAZ and CQD, unpublished) so if ThDN is also inhibitory, it would provide a  
416 disinhibitory circuit motif for activating A18b. This would be synergistic with MDN direct  
417 excitation of A18b. There are currently no genetic tools providing access to ThDN or A27k

418 neurons, and the existing driver line for A27I has off-target neurons, precluding a functional  
419 analysis of this pathway.

420 MDNs can induce backward crawling in the limbless *Drosophila* larva, and persist into  
421 adulthood where they can induce backward walking in the six-legged adult fly. This is  
422 remarkable, because most mechanosensory neurons are completely different (Kendroud et al.,  
423 2018; Kernan, 2007), although there are some gustatory and stomatogastric sensory neurons  
424 that survive from larva to adult (Kendroud et al., 2018). Similarly, most or all of the downstream  
425 motor neurons controlling crawling (larva) and walking (adult) are different: abdominal motor  
426 neurons in the larva and thoracic motor neurons in the adult. It will be interesting to see which,  
427 if any, interneurons in the larval MDN circuit remain connected in the adult, and whether they  
428 perform the same function in the adult. For example, does the larval Pair1-A27h circuit persist  
429 in the adult, but become restricted to thoracic segments? It is also interesting to consider the  
430 evolution of the MDN circuit; some of the neurons we describe here may originally have been  
431 used to regulate adult walking, prior to becoming co-opted for regulating larval crawling.

432

433

## 434 **Materials and Methods**

435

### 436 Transgenes

437 *pBDP-Gal4* in attP2 (gift from B.D. Pfeiffer, JRC)

438 *pBDP-LexA:p65Uw* in attP40 (gift from T. Shirangi, Villanova Univ)

439 *R53F07-Gal4* (BDSC# 50442)

440 *R53F07-Gal4<sup>DBD</sup>* (Doe lab)

441 *R49F02-Gal4<sup>AD</sup>* (a gift from G. Rubin, JRC)

442 *R94E10-Gal4* (A18b line; BDSC# 40689)

443 *R94E10-lexA* (A18b line; Doe lab)

444 *R36G02-Gal4* (A27h line; BDSC# 49939)

445 *R75C02-Gal4* (Pair1 line; BDSC# 39886)

446 *R75C02-lexA* (Pair1 line; a gift from M. Louis, UC Santa Barbara)

447 *ss01613-Gal4* (Split3; a gift from M. Louis, UC Santa Barbara and J. Truman, Univ. Washington)

448 *CQ2-lexA* (U1-U5 motor neurons; Doe lab)

449 *RRa-Gal4* (aCC/RP2 motor neurons; a gift from M. Fujioka, Thomas Jefferson Univ.)

450 *tsh-lexA* (a gift from J. Simpson, UC Santa Barbara)

451 *UAS-Chrimson:mCherry* (a gift from V. Jayaraman, JRC)

452 *UAS-Chrimson:mVenus* (BDSC# 55138)

453 *UAS.dsFRT.Chrimson:mVenus* (a gift from G. Rubin, JRC)

454 *UAS-MCFO2* (BDSC# 64086)

455 *UAS-GCaMP6m* (BDSC# 42748)

456 *UAS-GCaMP6f* (a gift from V. Jayaraman, JRC)

457 *UAS-jRCaMP1b* (BDSC# 63793)

458 *lexAop-GCaMP6f* (gift from V. Jayaraman, JRC)

459 *lexAop-Gal80* (BDSC# 32213)

460 *lexAop-Chrimson:mCherry* (a gift from V. Jayaraman, JRC)

461 *lexAop-KZip+:3xHA* (a gift from B. White, NIH)

462 *UAS-CaMPARI* (BDSC# 58761)

463 *UAS-GtACR1* (a gift from A. Claridge-Chang, Duke-NUS Med School)

464 *lexAop-shibire<sup>ts</sup>* in attP2 (a gift from G. Rubin, JRC)

465 *VT044845-lexA* (adult moonwalker line; a gift from B. Dickson, JRC)

466 *hsFlpG5.PEST* (BDSC# 62118)

467 *pJFRC108-20XUAS-IVS-hPR:Flp-p10* (a gift from J. Truman, Univ. Washington)

468 *Actin5C-FRT>-dSTOP-FRT>-LexA:p65* (a gift from J. Truman, Univ. Washington)

469 *P[13XLexAop2-IVS-CsChrimson.mVenus] attP18* (BDSC# 55137)

470 *lexAop-(mCherry-STOP-FRT) ReaChR:Citrine VK00005* (BDSC #53744)

471

### 472 Fly stocks

473 Split1 (*R53F07-Gal4<sup>DBD</sup> R49F02-Gal4<sup>AD</sup>*)

474 Split2 (*R53F07-Gal4<sup>DBD</sup> R49F02-Gal4<sup>AD</sup> tsh-lexA lexAop-KZip+:3xHA*)

475 Split3 (*ss01613-Gal4*)

476 Immortalization stock: *P[13XLexAop2-IVS-CsChrimson.mVenus]attP18; Actin5C-FRT-STOP-FRT-*

477 *lexAop::65; pJFRC108-20XUAS-IVS-hPR::Flp-p10*

478

### 479 Immunostaining and imaging

480 Standard confocal microscopy, immunocytochemistry and MCFO methods were performed as  
481 previously described for larvae (Clark et al., 2016; Heckscher et al., 2015) or adults (Nern et al., 2015;  
482 Pfeiffer et al., 2008). Primary antibodies used recognize: GFP or Venus (rabbit, 1:500, ThermoFisher,  
483 Waltham, MA; chicken 1:1000, Abcam13970, Eugene, OR), GFP or Citrine (Camelid sdAB direct labeled  
484 with AbberiorStar635P, 1:1000, NanoTab Biotech., Gottingen, Germany), GABA (rabbit, 1:1000, Sigma,  
485 St. Louis, MO), mCherry (rabbit, 1:1000, Novus, Littleton, CO), Corazonin (rabbit, 1:2000, J. Veenstra,  
486 Univ Bordeaux), FasII (mouse, 1:100, Developmental Studies Hybridoma Bank, Iowa City, IA), HA  
487 (mouse, 1:200, Cell signaling, Danvers, MA), or V5 (rabbit, 1:400, Rockland, Atlanta, GA), Flag (rabbit,  
488 1:200, Rockland, Atlanta, GA). Standard methods were used for pupal staging (Bainbridge and Bownes,  
489 1981). Secondary antibodies were from Jackson Immunoresearch (West Grove, PA) and used according  
490 to manufacturer's instructions. Confocal image stacks were acquired on Zeiss 700, 710, or 800  
491 microscopes. Images were processed in Fiji (<https://imagej.net/Fiji>), Adobe Photoshop (Adobe, San  
492 Jose, CA), and Adobe Illustrator (Adobe, San Jose, CA). When adjustments to brightness and contrast  
493 were needed, they were applied to the entire image uniformly. Mosaic images to show different focal  
494 planes were assembled in Fiji or Photoshop.

#### 495 Electron microscopy and CATMAID

496 We reconstructed neurons in CATMAID using a Google Chrome browser as previously described  
497 (Ohshima et al., 2015). Figures were generated using CATMAID graph or 3D widgets.

#### 498 Chrimson and GtACR behavioral experiments

499 Embryos were collected for 4 h on standard 3.0% agar apple juice collection caps with a thin layer of wet  
500 yeast, and transferred to standard cornmeal fly food supplemented with 0.5mM all-*trans* retinal at 48 hours  
501 after collection. Following another 48 hours (96 +/-6 h larval age) animals were collected and transferred to  
502 3.0% agar apple juice caps and relocated to the room where behavioral data was collected. Five minutes  
503 after acclimation to the room, one animal at a time was transferred to a 3.0% agar apple juice square  
504 arenas, 2 cm thick with an area of 81.0cm<sup>2</sup>, and crawling was then recorded at 5 Hz using an Axiocam 506  
505 mono under low transmitted light from below for 15 s followed by 15 s under 0.275 mW/mm<sup>2</sup> green light.  
506 Temperature of the room was kept at 24+/-2C°. Number of forward waves and backward waves, and  
507 percent of time engaged in either forward, backward or paused were manually quantified using the recorded  
508 movies. Unpaired Student's t-test was performed to ask significance in the number of waves over 15 s.

509 The Chrimson together with Shibire silencing experiment (Figure 7F-G) was performed as the  
510 Chrimson only experiments described above except that the agar arena was placed on top of a heating plate  
511 which was kept at 25C° or at 32C° for Shibire Off or On groups respectively. Animals were individually  
512 placed on the arena. After 1 minute to reach the desired temperature we manually quantified the number of  
513 forward and backward waves with no light, under 0.07 mW/mm<sup>2</sup> green light or 0.275 mW/mm<sup>2</sup> green light.

514 For GtACR1 experiments (Figure 1G-H), instead of square arenas, animals were placed into a  
515 0.75mm wide agar lane to limit their movement to forward or backward locomotion only. To quantify  
516 backward wave probability (Figure 1G) larvae were gently poked in the most anterior part of their body and  
517 scored whether the animal responded with backward crawling (regardless of how many backward peristaltic  
518 waves). We then calculated the probability by dividing the number of times the animal began backward  
519 crawling immediately after a poke by the total number of times that each animal was poked, which was  
520 always 5 times. For each animal this was done with no light first and then under 0.96 mW/mm<sup>2</sup> green light.  
521 We performed one-way ANOVA with Bonferroni post-hoc test between light ON groups. For panel 1H we  
522 induced a backward run and turned on the 0.96 mW/mm<sup>2</sup> green light immediately after the second backward  
523 wave. We define a backward run as two or more consecutive backward peristaltic waves after being poked  
524  
525

526 in the most anterior part of the animal. We scored how many backward waves animals performed after the  
527 light was turned on.

528

### 529 Calcium Imaging

530 For dual-color and single-color calcium imaging in fictive preps, freshly dissected brains were mounted on  
531 12mm round Poly-D-Lysine Coverslips (Corning® BioCoat™) in HL3.1 saline, which were then were placed  
532 on 25 mm × 75 mm glass slides to be imaged with a 40× objective on an upright Zeiss LSM-800 confocal  
533 microscopy. To do calcium imaging in intact animals (Figure 5E), a second or third instar larva was washed  
534 with distilled water, then moved into a drop of halocarbon oil 700 (Sigma, St. Louis, MO) on the slide. A 22  
535 mm × 40 mm cover glass was put on the larva and pressed gently to restrict larval locomotion. The larva  
536 was mounted ventral side up so that the ventral nerve cord could be imaged using 40× objective on an  
537 upright Zeiss LSM800 confocal microscope. To simultaneously image GCaMP6m and jRCaMP1b, signals in  
538 non-overlapping regions of interest (ROI) were imaged with 488 nm and 561 nm diode lasers. The images  
539 were imported to Fiji (<https://imagej.net/fiji>) by which GCaMP6m and jRCaMP1b channels were separated.  
540 The  $\Delta F/F_0$  of each channel was calculated as  $(F-F_0)/F_0$ , where  $F_0$  was averaged over ~1s immediately before  
541 the start of the forward or backward waves in each ROI.

542

### 543 Functional connectivity assays

544 Freshly dissected brains were mounted in HL3.1 saline as described above, with the exception that the  
545 dissection was done under the minimum level of light possible to prevent activation of Chrimson. GCaMP6m  
546 or GCaMP6f signal in postsynaptic neurons were imaged using 2-4% power of the 488nm laser with a 40×  
547 objective on an upright Zeiss LSM800 confocal microscope. Chrimson in presynaptic neurons was activated  
548 with three pulses of 561 nm laser at 100% power delivered via the same 40× objective using the bleaching  
549 function in the ZEN Zeiss software. The total length of the pulses carried depend on the ROI size which was  
550 kept consistent across ATR+ and ATR- samples within an experiment. For A18b activation (Figure 5I), the  
551 light pulse was 700 msec; for MDN activation (Figure 6B) and Pair1 (Figure 7B), the light pulse was 440  
552 msec. To quantify  $\Delta F/F_0$  traces we used MATLAB. Before extracting any fluorescence our script first  
553 performs rigid registration to correct for movement while recording.  $F_0$  was set as the average fluorescence  
554 of the 3 frames acquired before each Chrimson stimulus analyzed. For predicted excitatory connections  
555 (Figure 5I and 6B), we first average  $\Delta F/F_0$  traces for two consecutive 561nm Chrimson stimuli separated by  
556 20 488nm acquisition frames. This was enough time to let GCaMP6f levels back to ground state. For  
557 predicted inhibitory connections (Figure 7B), we gave multiple 440 msec Chrimson stimuli separated by 5  
558 seconds. After recording, we then selected all events where the start of the Chrimson stimulus coincided  
559 with an A27h forward activity wave, which was necessary to elevate the GCaMP6m levels sufficiently to see  
560 subsequent Chrimson-induced inhibition. We selected the A27h segmental neuron with the highest mean  
561 fluorescent intensity in the frame before the Chrimson stimulus from segments A4-A7 (where Pair1 synapses  
562 with A27h). For all Chrimson experiments, traces were averaged across animals.

563

### 564 CaMPARI experiments

565 Larvae were collected 96hrs days after egg laying and place in agar apple collection caps for at least 5  
566 min to acclimate animals to the environment. Using a soft brush, larvae were placed into a 0.75mm wide  
567 agar lane to limit their movement to forward or backward locomotion only. We let the animals start  
568 crawling forward for at least 5 seconds in the lanes. For forward data collection, the photoconvertible  
569 405nm light was turned on at 0.5mW/mm<sup>2</sup> while the larvae crawled forward for 30 sec. For backward,  
570 same light was turned on and backward locomotion was immediately induced by gentle touch on the  
571 most anterior part of the larva with a semi-blunt pin. Brains were dissected in HL3.1, then green and red  
572 CaMPARI signals were imaged with a 40× objective on Zeiss LSM-800 confocal microscope in the

573 regions of interest. ROIs were manually selected using the green channel. Fluorescence within ROIs  
574 were quantified using Image J.

575

#### 576 Adult behavioral intersectional experiment (Figure 8 F-I)

577 After eclosion adults were transferred to standard cornmeal fly food supplemented with ATR (0.5mM) for  
578 4 days changing to fresh food after two days. Wings were clipped and animals were placed in ring  
579 arenas made of 3.0% agar apple juice. The ring arena size was 1.4cm outer diameter, 1.0cm inner  
580 diameter and 0.2cm height. After 5 minutes for environmental acclimation, animal behavior was recorded  
581 at 5 Hz using an Axiocam 506 mono under low transmitted light for 10 seconds followed by 10 seconds  
582 under 0.28 mW/mm<sup>2</sup> red light. This was done three times for each animal. To quantify backward  
583 locomotion probability upon light stimulus we divided the amount of times the animal began backward  
584 walking within 2 seconds after light stimulus over the total number of times the animals was presented  
585 with light. To calculate significance we used Student's t-test unpaired analysis.

586

#### 587 Adult behavior immortalization with RU486 experiment( Figure 8J-L)

588 Adult flies were allowed to lay eggs on standard culture medium that was supplemented with 1μM RU486  
589 and 2mM ATR. After 24 hours, light-induced backwards crawling larvae were transferred to culture medium  
590 supplemented with 2mM ATR and grown to adulthood. 2-6 day-old adult flies were individually transferred  
591 into a 10ml serological pipette for walking assay. Red-orange light from a 617nm high-power LED was fiber-  
592 coupled to a 200μm core optical cable that was manually triggered via a T-Cube LEDD1B driver (ThorLabs,  
593 Newton, NJ, USA). Optogenetic stimulation was measured via a photodiode power sensor (S130VC,  
594 ThorLabs) to be ~4.6 μW/mm<sup>2</sup>. We performed same analysis for the intersectional experiment (above) to  
595 quantify backward locomotion probability upon light stimulus.

596

#### 597 Statistical analysis

598 Statistical significance is denoted by asterisks: \*\*\*\*p<0.0001; \*\*\*p<0.001; \*\*p<0.01; \*p<0.05; n.s., not  
599 significant. All statistical Student's t-tests were performed using Graphpad Prism software. One way  
600 ANOVA with Bonferroni post-hoc test was done using <http://astatsa.com/>. The results are stated as  
601 mean ± s.d., unless otherwise noted.

602

#### 603 **Acknowledgements**

604 We thank Jim Truman and Matthieu Louis for unpublished fly lines targeting MDN and Pair1 neurons. We  
605 thank Brandon Mark for MATLAB scripts. We thank Todd Laverty, Gerry Rubin, Barry Dickson, Ben White,  
606 Miki Fujioka, Julie Simpson and Adam Claridge-Chang for fly stocks, and Barry Dickson, Shawn Lockery,  
607 Matthieu Louis, and Tory Herman for comments on the manuscript. We thank Avinash Kandelwal and Laura  
608 Herren for annotating neurons, and Keiko Hirono for generating transgenic constructs. Transgenic lines were  
609 generated by BestGene (Chino Hills, CA) or Genetivision (Houston, TX). Stocks obtained from the  
610 Bloomington Drosophila Stock Center (NIH P40OD018537) were used in this study. Funding was provided  
611 by HHMI (CQD, AC-R, AAZ, LM), NIH HD27056 (CQD, MQC), F32NS105350-01A1 (AC-R), T32HD007348-24  
612 (MQC), and T32GM007413-36 (MQC).

613

#### 614 **Author contributions**

615 MQC conceived of the project; MQC, LM, AC-R, AAZ performed experiments; RF generated the ssTEM  
616 volume; AAZ and AC annotated neurons in CATMAID; MQC, AC-R, AAZ, AC and CQD wrote the paper. All  
617 authors commented and approved of the manuscript.

618



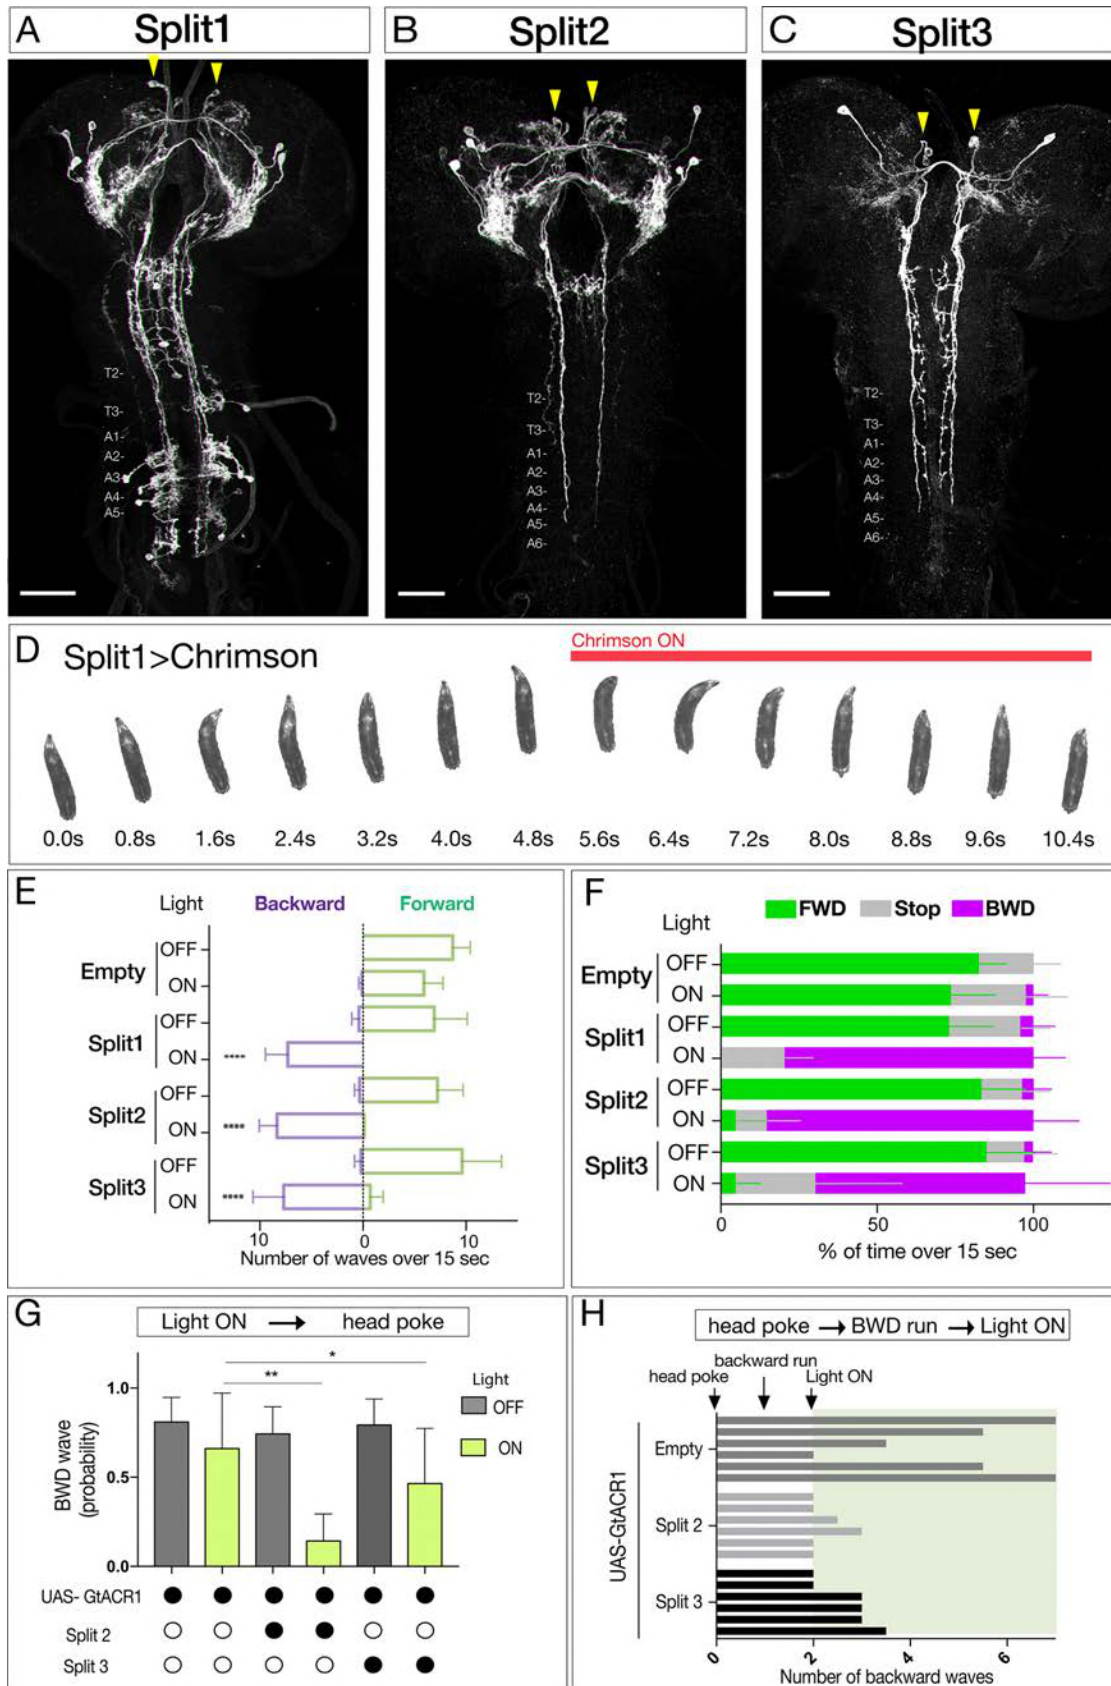

620 **Figure 1. Neurons sufficient to induce backwards locomotion in third instar larvae**  
621 (A-C) Split1-Split3 lines driving expression of membrane localized Venus in the third instar CNS. Corazonin (not  
622 shown) labels a single neuron in segments T2-A6, and was used to identify VNC segment identity. The only neurons  
623 potentially common to all three lines are a pair of bilateral ventral, anterior, medial neurons (arrowheads).  
624 Maximum intensity projection of entire CNS shown. Anterior, up; scale bars, 50µm. Genotypes: *R49F02-Gal4<sup>AD</sup>*  
625 *R53F07-Gal4<sup>DBD</sup> UAS-Chrimson:mVenus* (Split1); *R49F02-Gal4<sup>AD</sup> R53F07-Gal4<sup>DBD</sup> tsh-lexA lexAop-killer zipper UAS-*  
626 *Chrimson:mVenus* (Split2); *ss01613-Gal4 UAS-Chrimson:mVenus* (Split3).  
627 (D) Split1 activation induces backwards locomotion. Genotype: *R49F02-Gal4<sup>AD</sup> R53F07-Gal4<sup>DBD</sup> UAS-Chrimson:mVenus*.  
628 (E) Split1, Split2, or Split3 activation induces backward locomotion. Number of backward or forward waves in third  
629 instar larvae over 15s with or without Chrimson activation. N = 10 for all genotypes. Genotypes: *pBD-Gal4 UAS-*  
630 *Chrimson:mVenus* (Empty) and see A-C above for Split1-3 genotypes.  
631 (F) Split1, Split2, or Split3 activation induces backward locomotion. Percentage of time performing forward  
632 locomotion (green), backward locomotion (magenta) or paused (grey) in third instar larvae over 15s with or without  
633 Chrimson activation. N = 5 for all genotypes. Genotypes, see A-C.  
634 (G) Split2 or Split3 silencing reduces initiation of backward locomotion. Backward waves induced by a noxious head  
635 poke, with or without active GtACR1. Genotypes: *pBD-Gal4 UAS-GtACR1:mVenus* (first two bars, n= 20), *R49F02-*  
636 *Gal4<sup>AD</sup> R53F07-Gal4<sup>DBD</sup> tsh-lexA lexAop-killer zipper UAS-GtACR1:mVenus* (middle two bars, n = 8), *ss01613-Gal4*  
637 *UAS-GtACR1:mVenus* (last two bars, n = 25).  
638 (H) Split2 or Split3 neuron silencing stops ongoing backward locomotion. After each larva initiated a backward run  
639 (two backward waves), light was used to activate GtACR1 or a no Gal4 control, and the number of backward waves  
640 was counted. n=6 for both groups; each bar represents the average of two trials for the same larva. See G for  
641 genotypes.  
642

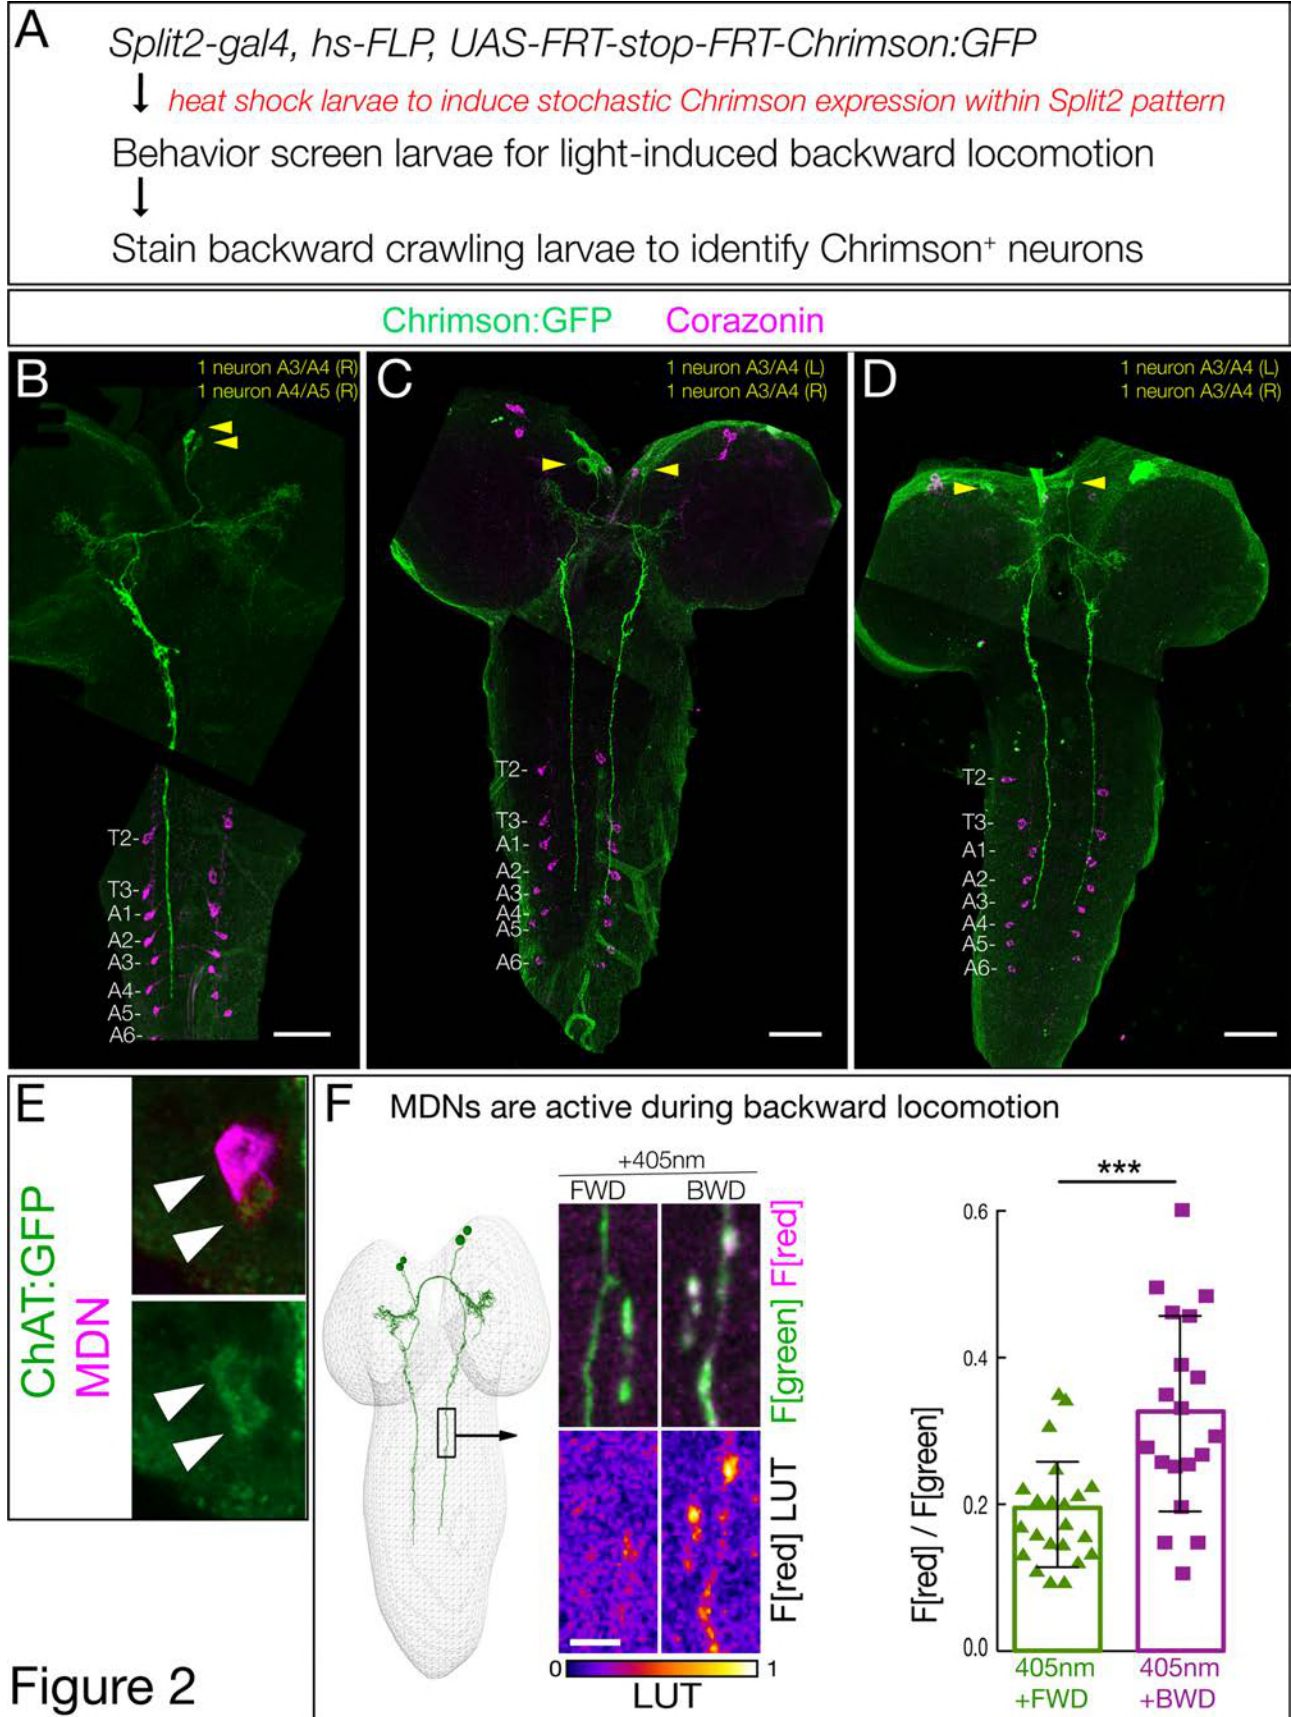

Figure 2

644 **Figure 2. Two brain descending neurons are sufficient to induce backward larval locomotion**  
645 (A) Experimental flow for generating sparse, stochastic patterns of Chrimson in subsets of the Split2 expression  
646 pattern. Genotype: *hsFlpG5.PEST R49F02-Gal4<sup>AD</sup> R53F07-Gal4<sup>DBD</sup> tsh-lexA, lexAop-killer zipper*  
647 *UAS.dsFRT.Chrimson:mVenus*.  
648 (B-D) The CNS from three larvae that crawled backward in response to Chrimson activation. All show expression in  
649 neurons with medial cell bodies, bilateral arbors, and a contralateral descending projection to A3-A5. (B) Note there  
650 is a tear in the CNS near segment T1. Chrimson:Venus, green; Corazonin (Crz; segmental marker), magenta. Scale  
651 bar, 50  $\mu$ m.  
652 (E) MDNs are cholinergic. MDNs marked with mCherry (magenta) express ChAT:GFP (green). Genotype: *R49F02-*  
653 *Gal4<sup>AD</sup>, UAS-Chrimson:mCherry; R53F07-Gal4<sup>DBD</sup>, mimic ChAT:GFP*.  
654 (F) MDNs are preferentially active during backward (BWD) not forward (FWD) locomotion in the intact larva.  
655 CaMPARI in MDN descending projections within the SEZ of third instar larvae. Top, fluorescence emission following  
656 excitation by 488nm (green) or 561nm (magenta); bottom, emission from 561nm imaging alone. Right,  
657 quantification of red fluorescence over green fluorescence, mean intensity. Each value represents data from an  
658 individual descending projection. See methods for details. n= 22 for FWD and 19 for BWD. Scale bar, 10  $\mu$ m.  
659 Genotype: *R49F02-Gal4<sup>AD</sup> R53F07-Gal4<sup>DBD</sup> UAS-CaMPARI*.  
660  
661

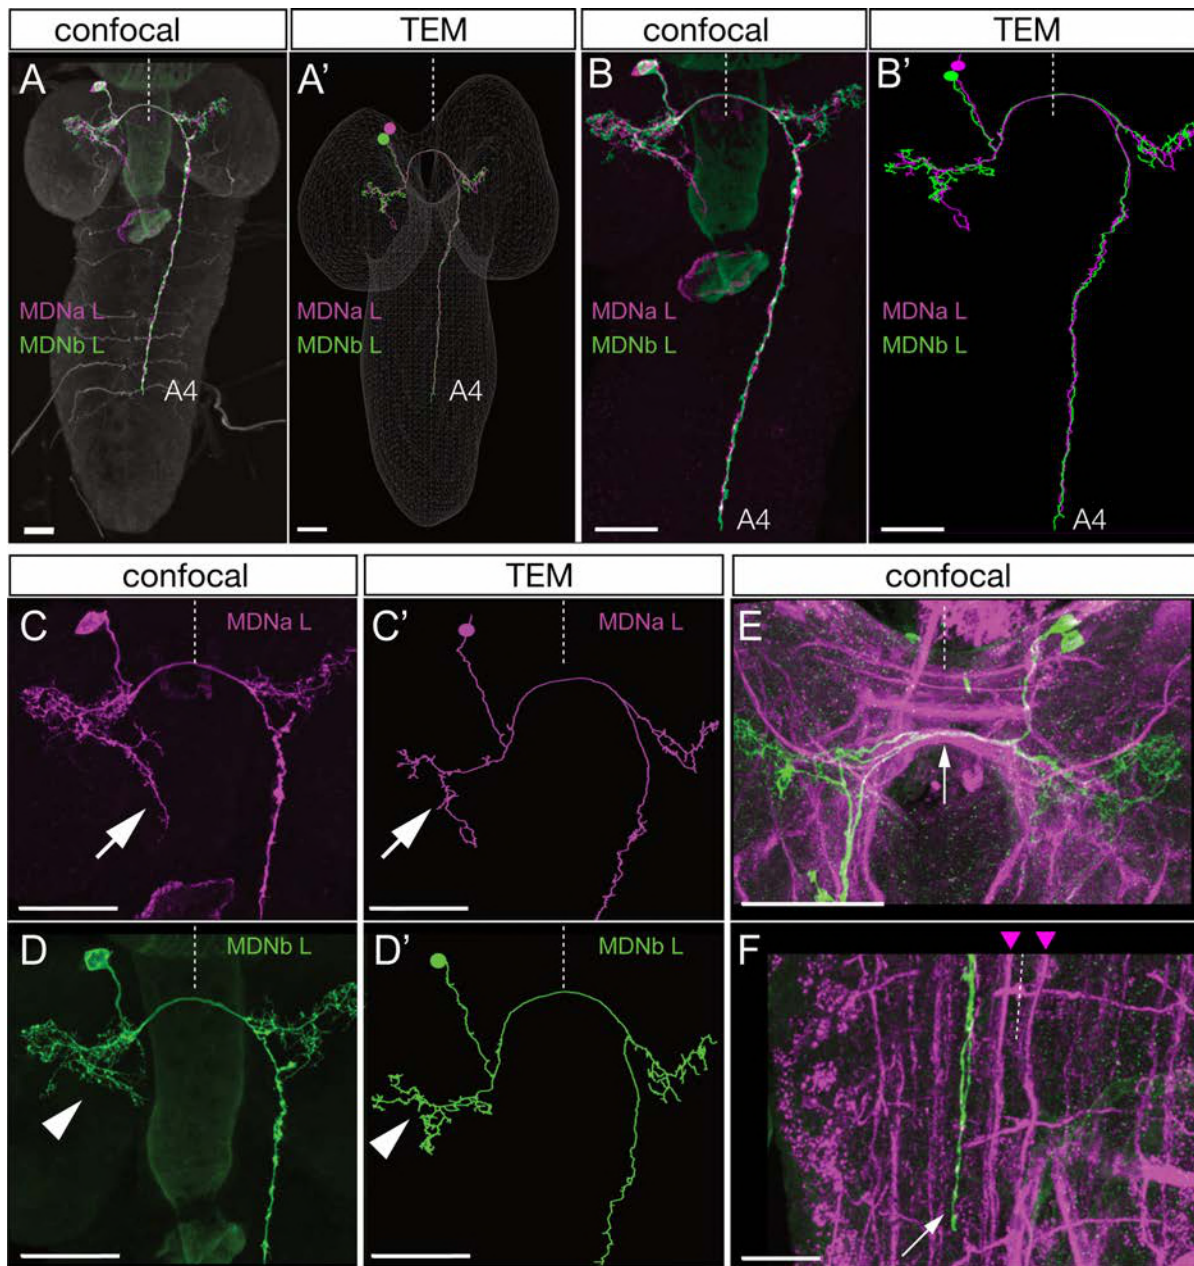

662  
663

**Figure 3. Identification of Mooncrawler Descending Neurons by light and electron microscopy**

664  
665 (A-F) Light microscopy. Multicolor FLP-out (MCFO) was used to visualize the morphology of individual neurons in the  
666 Split2 pattern in first instar larvae. Two neurons show morphology matching that seen in the Chrimson FLP-out  
667 experiments in Figure 2. Both neurons have anterior medial somata (A), ipsilateral and contralateral arbors (A-D), a  
668 contralateral projection in the posterior commissure (E, arrow), and descending neurons terminating in segments  
669 A3-A5 of the VNC (A-B). The neurons run lateral to the dorso-medial (DM) FasII tract in the VNC (F, DM tract marked  
670 with arrowheads). The two neurons can be distinguished by their ipsilateral arbor, which is either linear (C, arrow) or  
671 bushy (D, arrowhead).

672 (A'-D') Reconstructions from serial section transmission electron microscopy (TEM) of a first instar larva. Two  
673 neurons indistinguishable from the MDNs can be identified in the TEM reconstruction: MDNa (linear ipsilateral  
674 arbor) and MDNb (bushy ipsilateral arbor). We simply call them MDNs due to their similar morphology and  
675 connectivity. All panels show dorsal views with midline indicated (dashed line). Scale bars, 20  $\mu$ m.

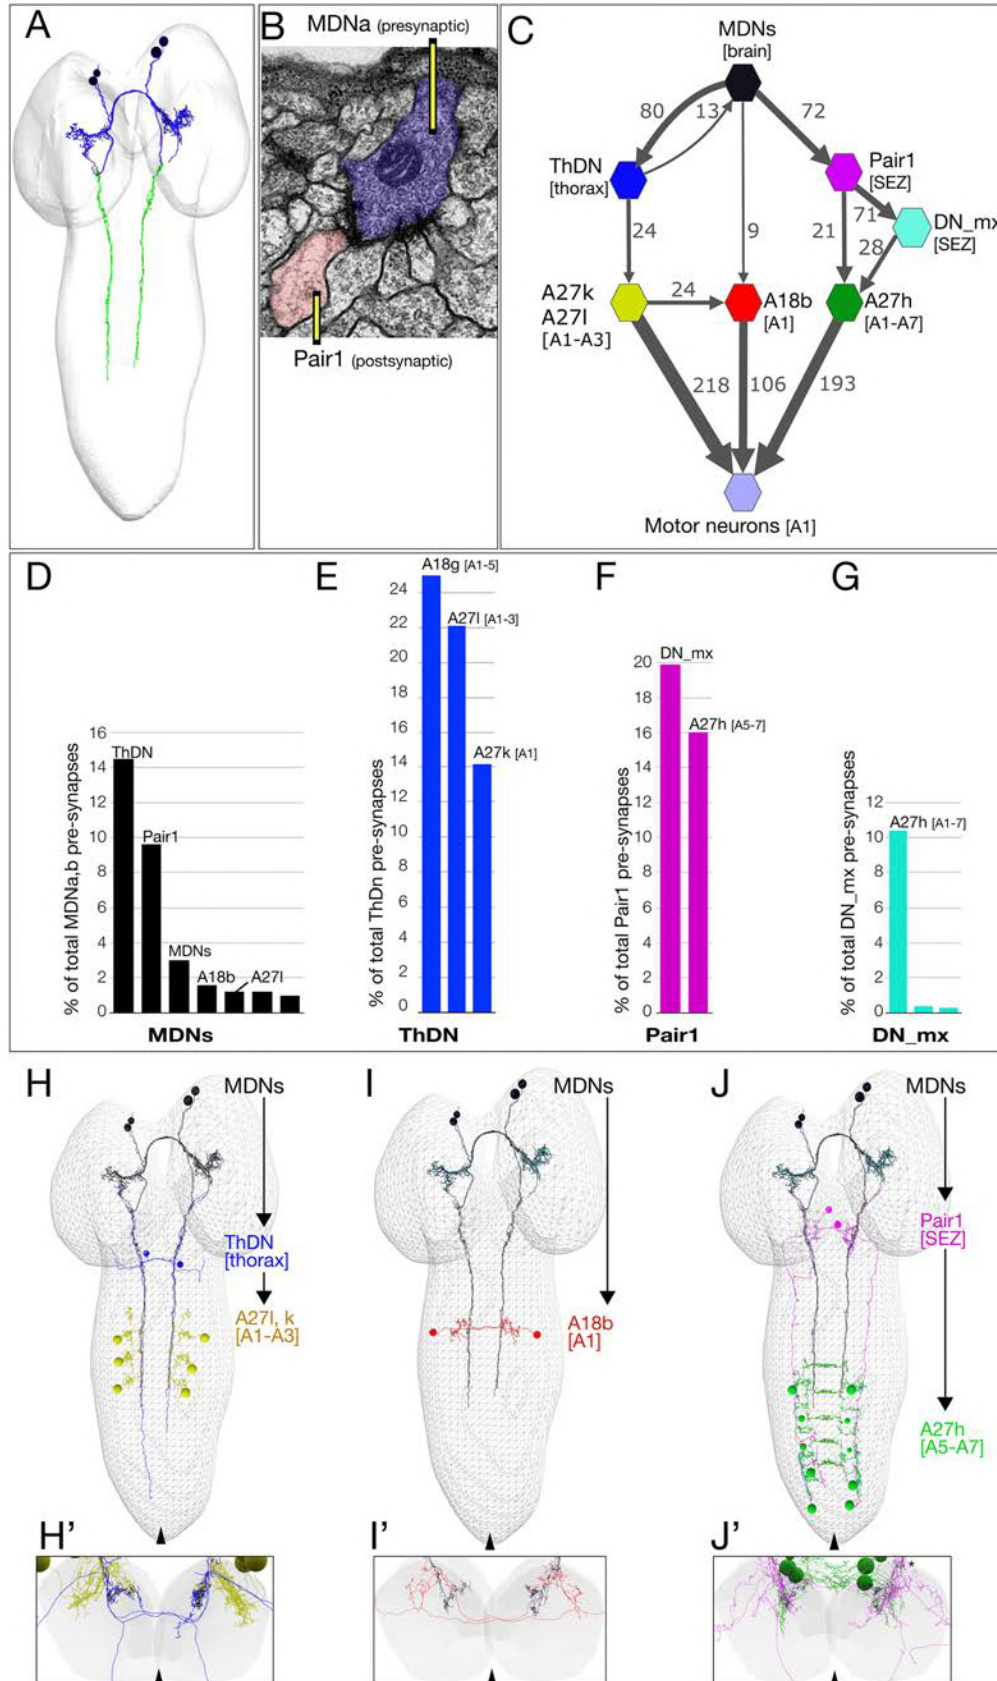

Figure 4

677 **Figure 4. The MDN connectome: three pathways to distinct subsets of premotor neurons**  
678 (A) TEM reconstruction of the bilateral MDN<sub>a,b</sub> neurons. Neuronal skeletons are colored to show post-synapses in  
679 the presumptive dendritic arbors of the brain (blue) and pre-synapses in the presumptive axonal descending process  
680 (green). Anterior, up.  
681 (B) Representative MDN output pre-synapse (blue) onto a post-synaptic Pair1 neuron (pink).  
682 (C) MDNs and their strongest post-synaptic partners (synapse number shown next to connection arrows, and line  
683 width is proportional to synapse number). All connectivity is shown except unilateral synapses, <6 synapses, and the  
684 15 synapses between MDNs. Each polygon represents pairs of the indicated neuron with the exception of these  
685 larger groups: A27k/A27l (six A27l neurons in A1-A3, four A27l neurons in A1-A2); A27h (14 neurons in A1-A7), and  
686 30 pair of motor neurons in A1. This graph is provided as Supplemental File1.json that can be opened in CATMAID.  
687 (D-G) Quantification of the percent of total pre-synapses that are targeted to the indicated neuron. All connectivity  
688 is shown except unilateral or <5 synapse connections.  
689 (H-J) The three MDN to premotor neuron pathways. (H) MDN-ThDN-A27l/k pathway. Only A27l is shown; A27k has a  
690 very similar morphology. (I) MDN-A18b pathway. (J) MDN-Pair1-A27h pathway. Dorsal view; anterior, up; midline,  
691 arrowhead.  
692 (H'-I') Respective cross-sectional view of VNC neuropil (gray) and neurons in each pathway; note that synapses are  
693 primarily in the dorsal (motor) neuropil. Dorsal up, midline, arrowhead. Asterisk in J' shows the approximate site of  
694 the synapse shown in panel B.  
695  
696

697

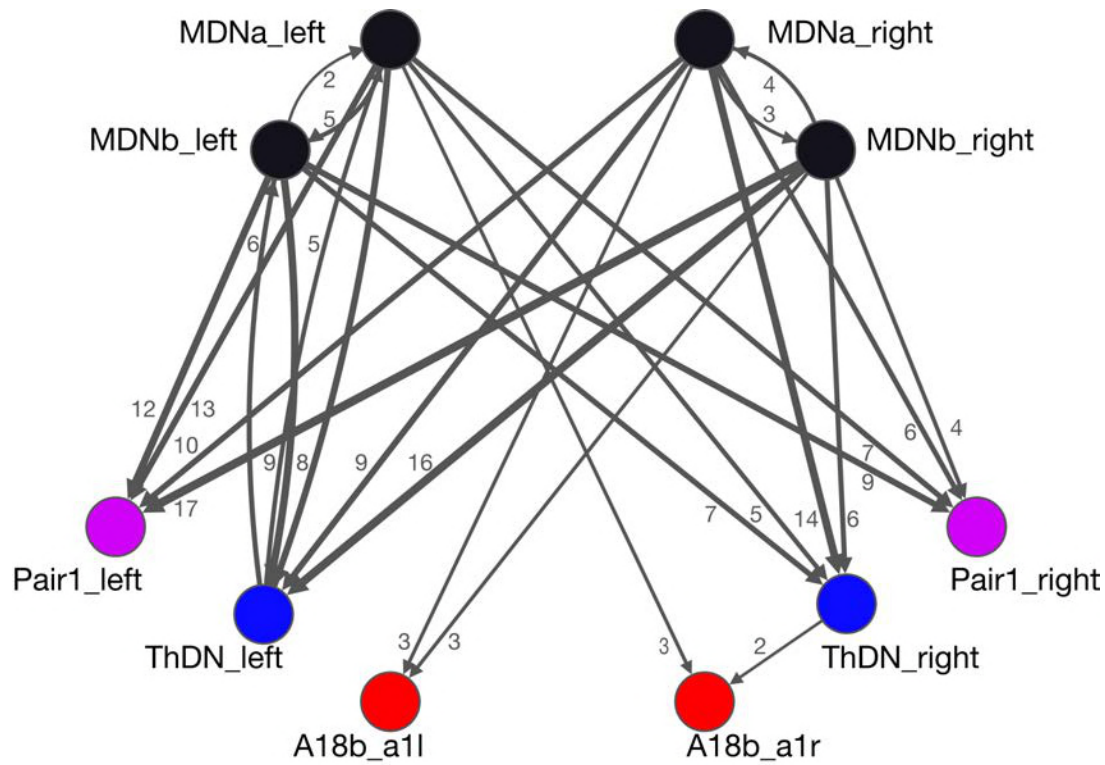

698

699

700

701

**Supplement to Figure 4. All MDNs have similar connectivity.**

702

All synapses between the MDNs and output target neurons are shown, except those with single synapse connectivity. All MDNs have similar input connectivity as well (data not shown).

703

704

705



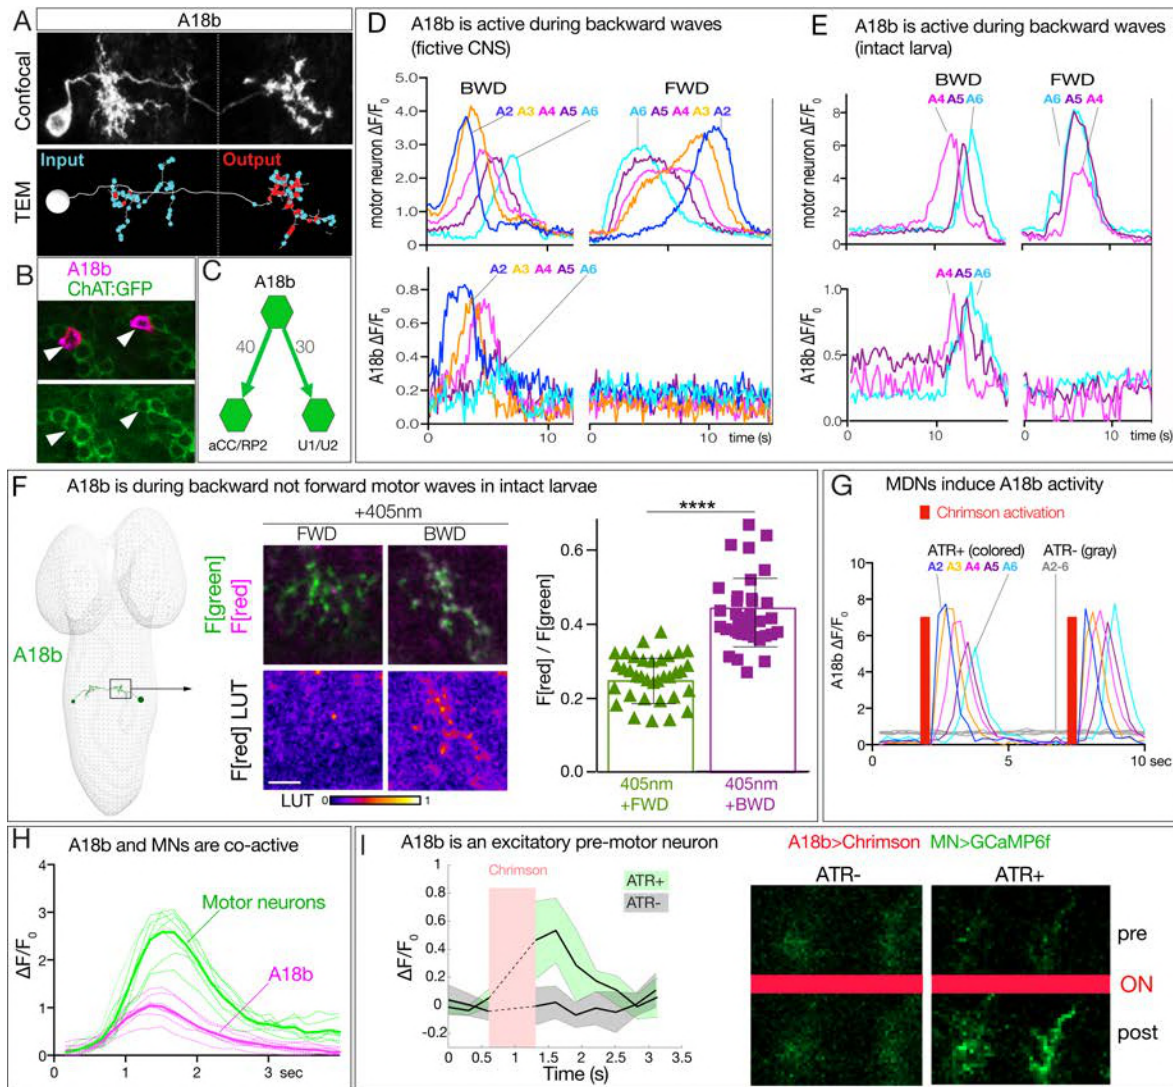

Figure 5

706

707 **Figure 5. MDN activates the excitatory backward-active A18b premotor neuron.**  
708 (A) A18b morphology by light (MCFO) and electron microscopy (TEM). Top: Dorsal view of an individual A18b neuron  
709 in a second instar larval CNS by light microscopy (*R94E10 > MCFO*). Bottom: Dorsal view of an individual A18b  
710 neuron in a first instar larva in the TEM reconstruction. Cyan dots, post-synaptic sites; red dots, pre-synaptic sites.  
711 Anterior, up. Midline, dashed line.  
712 (B) A18b is cholinergic. A18b cell body (mCherry; magenta) and ChAT:GFP (green). Genotype: *R94E10-Gal4, UAS-*  
713 *Chrimson:mCherry; mimic ChAT:GFP*.  
714 (C) Connectivity of A18b to the dorsal-projecting motor neurons aCC/ RP2 and U1/U2 in segment A1 from the TEM  
715 reconstruction. Synapse number shown.  
716 (D) In fictive preparations, A18b neurons are active in backward but not forward locomotion.  $\Delta F/F_0$  of GCaMP6m in  
717 U1-U5 motor neurons (top) or jRCaMP1b in A18b (bottom) of five segments executing a forward (FWD) and then a  
718 backward (BWD) wave. This experiment was performed on 8 different isolated third instar CNSs with similar results.  
719 Genotype: *CQ-lexA/+; lexAop-GCaMP6m/R94E10-Gal4 UAS-jRCaMP1b*.  
720 (E) In intact larvae, A18b neurons are active in backward but not forward locomotion.  $\Delta F/F_0$  of GCaMP6m in motor  
721 neurons (top) and jRCaMP1b in A18b (bottom) in three segments. Times of BWD and FWD motor waves indicated.  
722 This experiment was performed on 19 waves (11 BWD, 8 FWD) in 7 third instar larvae, all with similar results.  
723 Genotype: *CQ-lexA/+; lexAop-GCaMP6m/R94E10-Gal4 UAS-jRCaMP1b*  
724 (F) In intact larvae, A18b is preferentially active during backward not forward locomotion. CaMPARI in A18b neurites  
725 in a third instar larval CNS. Top, fluorescence emission (F) following 488nm (green) or 561nm (magenta)  
726 illumination; bottom, emission from 561nm alone. Left, photoconversion (405nm) during FWD or BWD locomotion.  
727 Right, quantification of red fluorescence over green fluorescence mean intensity. Each value represents data from  
728 an individual neurite. n= 35 for FWD and 36 for BWD. LUT, 561nm emission intensity look up table. Scale bar, 10 $\mu$ m.  
729 Genotype: *R94E10-Gal4 UAS-CaMPARI*.  
730 (G) In fictive preparations, MDNs activate A18b neurons, and induce backward A18b activity waves. Chrimson is  
731 expressed in MDN, and GCaMP6f in A18b. Red bars, time of 561 nm Chrimson activation. Colored traces indicate the  
732  $\Delta F/F_0$  of A18b GCaMP6f signal in 5 segments of an ATR+ brain; gray traces are from ATR- animal. This experiment  
733 was performed on 5 different animals with similar results. Genotype: *R49F02-Gal4<sup>AD</sup>/R94E10-lexA; R53F07-*  
734 *Gal4<sup>DBD</sup>/lexAop-GCaMP6f UAS-Chrimson:mCherry*.  
735 (H) In fictive preparations, A18b fires synchronously with motor neurons during backward waves. Dual color calcium  
736 imaging of jRCaMP1b in A18b (red) and GCaMP6m in U1-U5 motor neurons (green). Dotted traces, activity during  
737 individual BWD waves in seven segments from 3 animals; solid traces, average. Genotype: *CQ-lexA/+; lexAop-*  
738 *GCaMP6m/R94E10-Gal4 UAS-jRCaMP1b*.  
739 (I) A18b is an excitatory pre-motor neuron. A18b expresses Chrimson and aCC/ RP2 motor neurons express GCaMP6f.  
740 Left:  $\Delta F/F_0$  traces of GCaMP6f before and after 561 nm Chrimson activation (red bar) of three aCC/ RP2 axons/dendrites  
741 within an animal. Solid bars represent means and shaded regions represent standard deviation from the mean (SDM).  
742 ATR+ is shaded in green and ATR- in grey. Five animals were used in each group. GCaMP6f signal was not acquired during  
743 the Chrimson activation (dashed lines); t-test analysis for the first  $\Delta F/F_0$  value after Chrimson activation between +ATR  
744 and -ATR showed significance (p=0.0071). Right: images of motor neuron GCaMP6f fluorescence pre- and post-Chrimson  
745 activation in ATR+ and ATR- larvae. Genotype: *94E10-lexA/+; lexAop-Chrimson:mCherry/RRa-Gal4 UAS-GCaMP6f*.  
746  
747

748

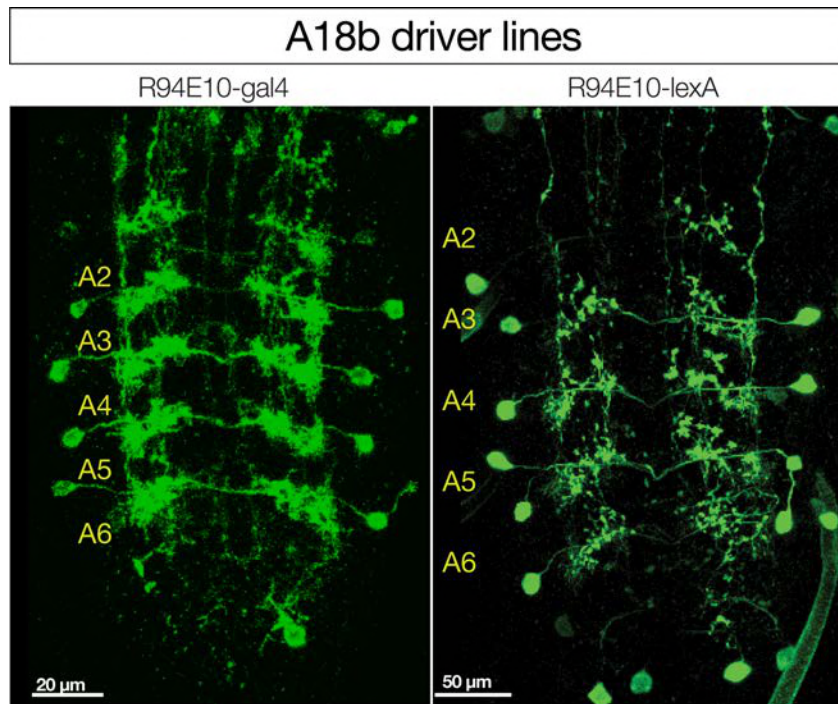

749

750

751

752

**Supplement to Figure 5. Driver lines for A18b.**

753

754

755

756

757

758

759

R94E10-Gal4 and R94E10-LexA expression in A18b (shown); in addition, both lines have off-target expression in the brain (~10 neurons) and more medially in the VNC (~3 neurons) that are not shown. Note that both lines lack expression in A18b in A1 where MDNs form synaptic contacts, thus the increase in GCaMP6f fluorescence observed following MDN activation is either due to A18b activation in A1 triggering a posterior wave of A18b activity, or another indirect pathway. Dorsal view; anterior up.

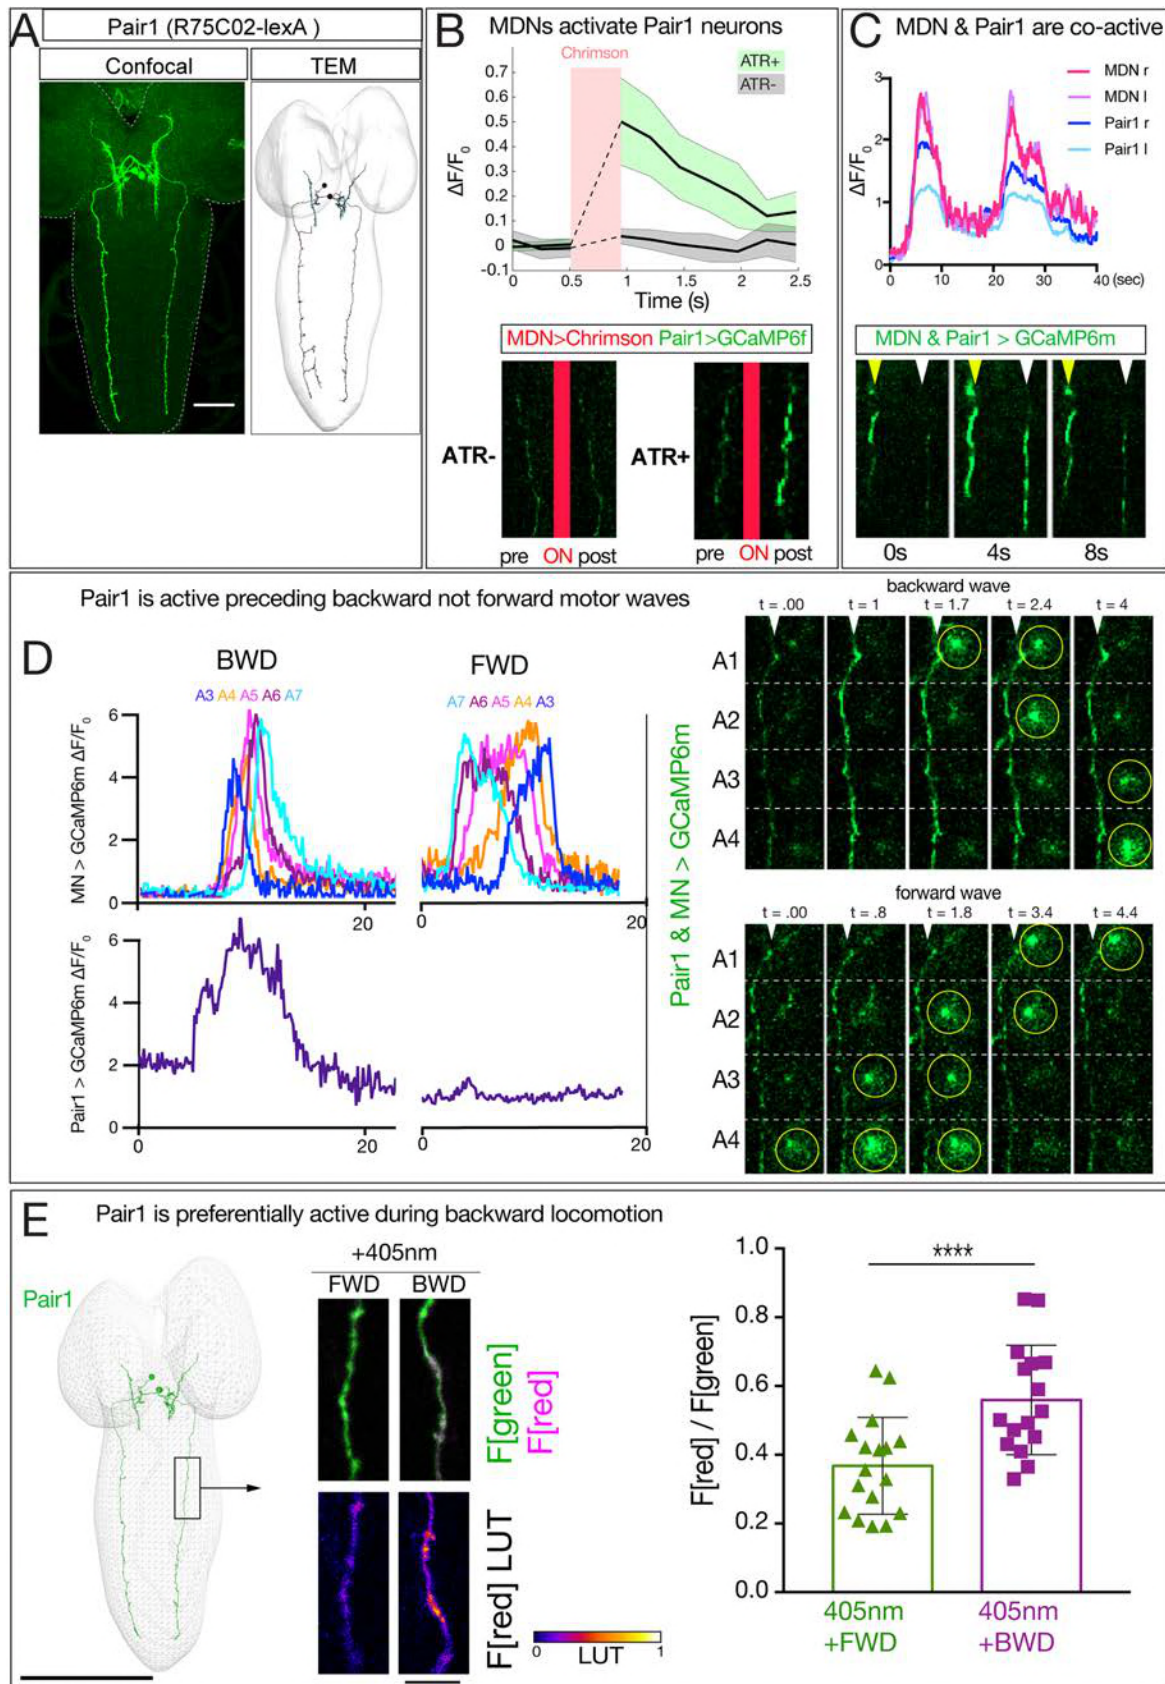

760

Figure 6

761 **Figure 6. MDN activates Pair1 which is a backward-active descending neuron.**  
762 (A) Pair1 neurons by light (confocal) and electron microscopy (TEM). Confocal image is an L3 CNS, TEM  
763 reconstruction is from an L1 CNS. Anterior, up. Scale bar, 50  $\mu\text{m}$ . Genotype: *R72C02-lexA lexAop-myr:GFP*.  
764 (B) MDNs activate Pair1. MDN expresses Chrimson and Pair1 neurons express GCaMP6f. Top:  $\Delta F/F_0$  traces of  
765 GCaMP6f before and after Chrimson activation (red bar) of Pair1 axons. Solid bars represent means and shaded  
766 regions represent standard deviation from the mean (SDM). ATR+ is shaded in green and ATR- in grey. Six animals  
767 were used for ATR+ and five for ATR-. GCaMP6f signal was not acquired during the Chrimson activation (dashed  
768 lines); t-test analysis for the first  $\Delta F/F_0$  value after Chrimson activation between +ATR and -ATR showed significance  
769 ( $p = 0.0004$ ). Bottom: images of Pair1 GCaMP6f fluorescence pre- and post-Chrimson activation in ATR+ and ATR-  
770 larvae. Genotype: *R49F02-Gal4<sup>AD</sup> / R75C02-lexA; R53F07-Gal4<sup>DBD</sup> / lexAop-GCaMP6f UAS-Chrimson:mCherry*.  
771 (C) MDN and Pair 1 are co-active. Top: MDN and Pair1 expressing GCaMP6m in different regions of the neuropil, and  
772 show concurrent activity. Bottom: MDNs (white arrowhead) and Pair1 (yellow arrowhead) show similar timing of  
773 GCaMP6m fluorescence during a BWD wave. Anterior, up; midline, right side of panel. MDN and Pair1 co-activity  
774 was observed in 5 out of 10 brains examined; the other 5 brains showed Pair1 activity but no MDN activity (see  
775 [Supplement to Figure 6](#)). Genotype: *ss01613-Gal4 / UAS-GCaMP6m; R75C02-Gal4*.  
776 (D) Pair1 is active during backward (BWD) but not forward (FWD) waves in fictive preparations. Left: Quantification  
777 of Pair1 GCaMP6m activity (bottom) and motor neuron activity (top) during fictive BWD and FWD waves in the same  
778 animal. Pair1 is not active during FWD waves. Right: Pair1 GCaMP6m activity (arrowheads) precedes U1-U5 motor  
779 neuron activity (circled) and only occurs during BWD motor waves.  $N = 53$  BWD waves from 7 different animals, and  
780 14 FWD waves from 4 different animals. Genotype: *CQ-lexA / UAS-GCaMP6m; lexAop-GCaMP6m / R94E10-Gal4*.  
781 (E) Pair1 is preferentially active during backward locomotion in the intact animal. CaMPARI was expressed in Pair1  
782 and photoconversion was activated during FWD or BWD locomotion in intact third instar larvae. There is  
783 significantly more CaMPARI photoconversion during BWD locomotion. Graph, quantification of red fluorescence  
784 over green fluorescence mean intensity. Triangle or square, data from an individual axon.  $n = 36$  for FWD and 34 for  
785 BWD. Scale bar, 10  $\mu\text{m}$ . Genotype: *R72C02-Gal4 UAS-CaMPARI*.  
786  
787

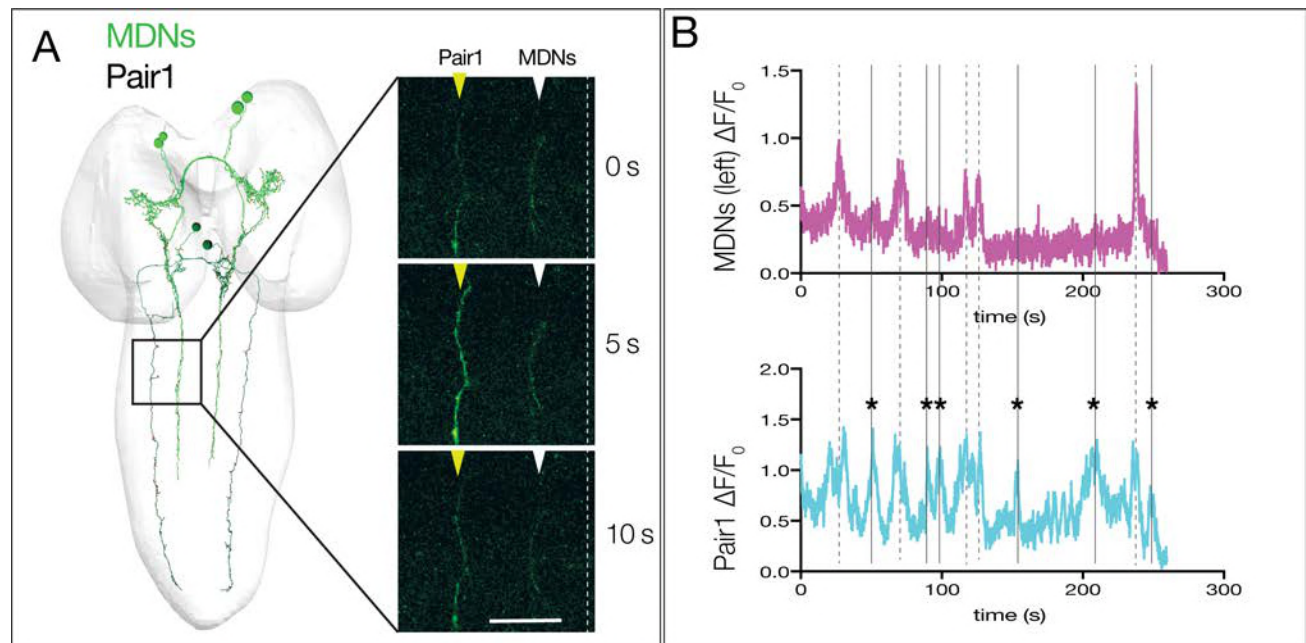

## Supplement to Figure 6

788  
789  
790  
791  
792  
793  
794  
795  
796

### Supplement to Figure 6. Pair1 can be activated independent of MDN activity.

(A) Left: dorsal view of TEM reconstruction of Pair1 and MDNs in a first instar larval CNS. Right: GCaMP6m activity in MDNs (white arrowheads) and Pair1 (yellow arrowheads) at three different time points in a third instar larval CNS fictive preparation. Pair1 is active while MDNs stay inactive. Anterior, up; midline, dashed line. Scale bar, 30  $\mu\text{m}$ .  
(B,C) GCaMP6m activation in MDNs (top) and Pair1 (bottom) in a third instar larval CNS showing Pair1 activity concurrent with MDN activity (dashed lines) and Pair1 activity independent of MDN activity (solid lines, asterisk).  
Genotype: *ss01613-Gal4 / UAS-GCaMP6m; R75C02-Gal4*.

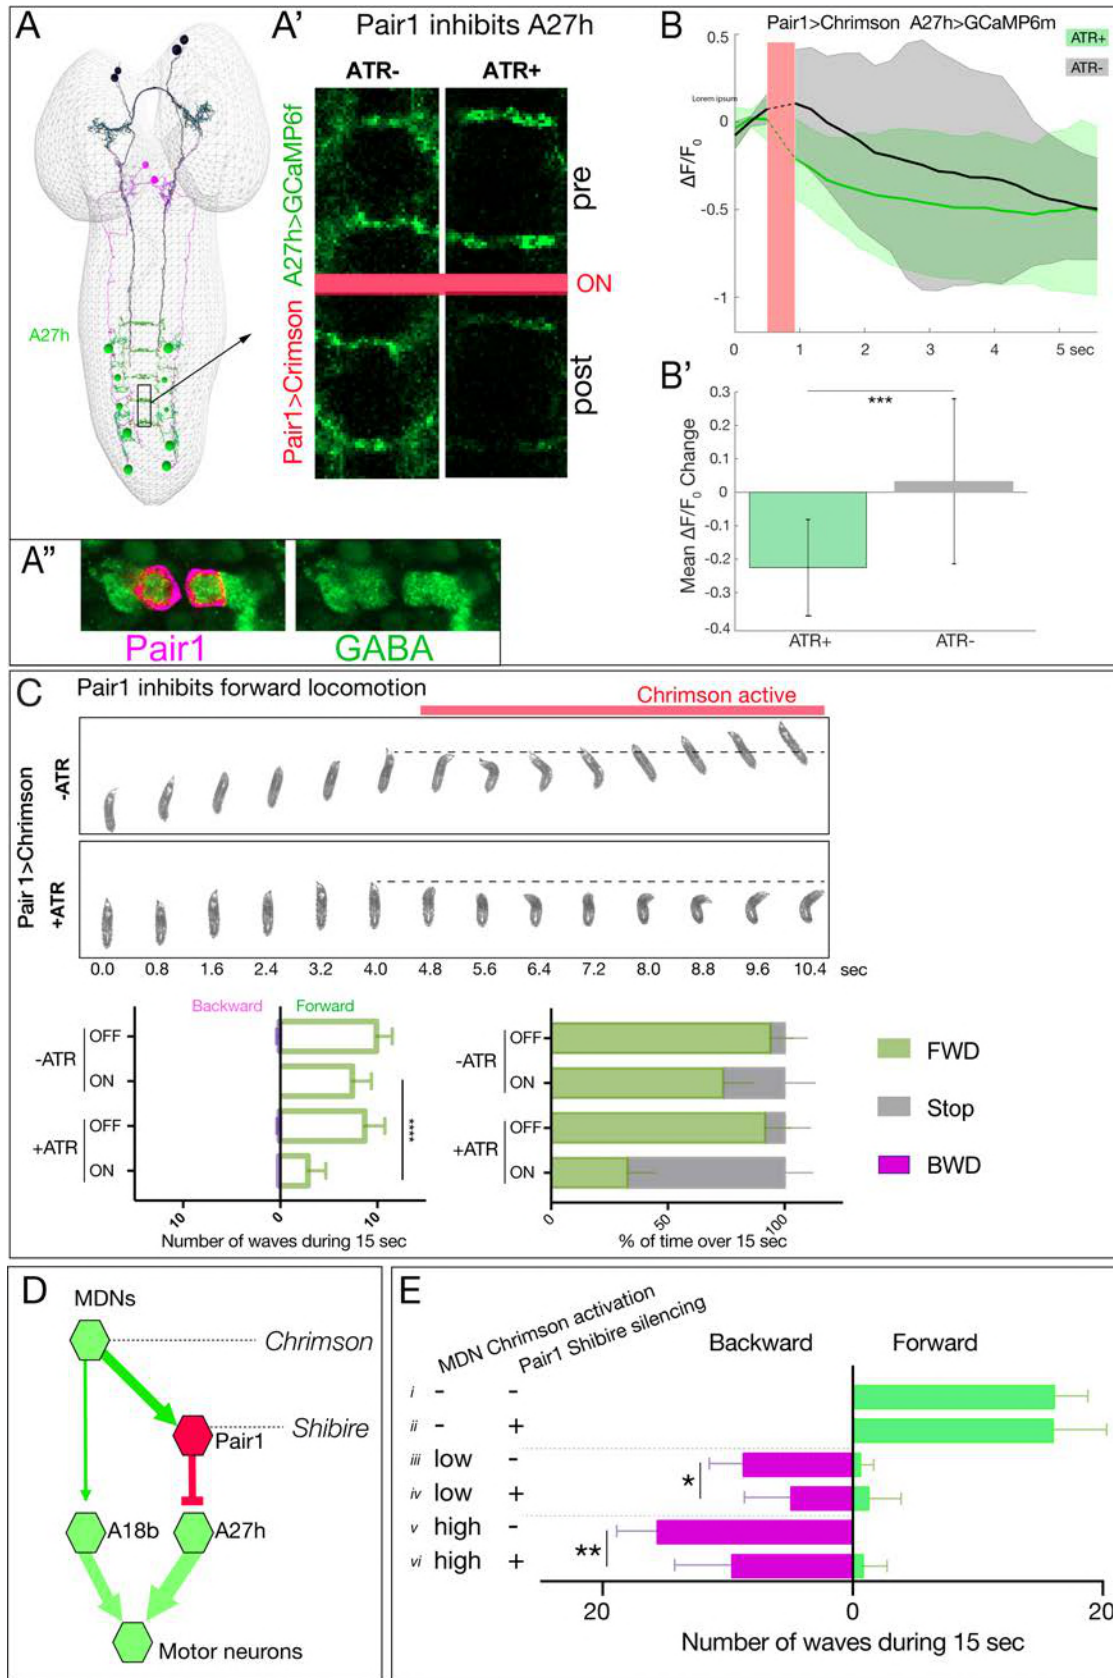

Figure 7

798 **Figure 7. Pair1 inhibits the forward-active A27h premotor neuron, and arrests forward locomotion.**  
799 (A,B) Pair1 inhibits A27h. (A) Reconstruction of MDNs (black), Pair1 neurons (magenta) and A27h neurons (green) in  
800 the first instar CNS TEM volume. (A') A27h GCaMP6m fluorescence is reduced following Pair1 Chrimson activation  
801 (red bar); two segments shown. (A'') Pair1 is GABAergic. Pair1 cell body (mCherry; magenta, arrowheads) and GABA  
802 (green). Genotype: *R75C02-Gal4, UAS-Chrimson:mCherry*. (B) A27h GCaMP6m fluorescence is reduced following  
803 Pair1 Chrimson activation (red bar). (B')  $\Delta F/F_0$  was significantly inhibited in ATR+ animals relative to ATR- controls. A  
804 total of 26 events from 7 animals were averaged for ATR+ and 16 events from 4 animals for ATR- group. See  
805 methods for further details. Genotype: *R75C02-lexA/+; lexAop-Chrimson:mCherry / R36G02-Gal4, UAS-GCaMP6m*.  
806 (C) Activation of Pair1 halts FWD locomotion for the duration of neuronal activation. Top, time-lapse images of +/-  
807 ATR larvae expressing Chrimson in Pair1 neurons before and during light stimulation. Bottom left, backward and  
808 forward wave number over 15s without Chrimson activation (Off) or during Chrimson activation (On) in third instar  
809 larvae. n = 12 for all groups. Bottom right, percent time performing forward locomotion (green), backward  
810 locomotion (magenta) or not moving (grey) over 15s without Chrimson activation (Off) or during Chrimson  
811 activation (On) in third instar larvae. n = 5 for all groups. Genotype: *R72C02-Gal4 UAS-Chrimson:mVenus*.  
812 (D) Schematic illustrating the experiment in (E). Arrows, excitatory connections; T-bar, inhibitory connection; line  
813 width proportional to synapse number.  
814 (E) Pair1 activity is necessary for efficient Chrimson-induced backward locomotion. Chrimson was expressed in  
815 MDNs, and *shibire<sup>ts</sup>* was expressed in Pair1 neurons. Low (0.07mW/mm<sup>2</sup>) or high (0.275mW/mm<sup>2</sup>) light intensities  
816 were used to induce MDN activity; a temperature shift to 32°C was used to inactivate *Shibire<sup>ts</sup>* and thus silence Pair1  
817 neurons. Silencing of Pair1 alone had no detectable phenotype (i, ii). Silencing Pair1 decreased the efficacy of MDN-  
818 induced backward locomotion at low or high light levels (iii-vi). Genotypes: *R49F02-Gal4<sup>AD</sup> R53F07-Gal4<sup>DBD</sup> UAS-*  
819 *Chrimson:mVenus pBD-lexA lexAop-Shibire<sup>ts</sup>* (i, iii and v) and *R49F02-Gal4<sup>AD</sup> R53F07-Gal4<sup>DBD</sup> UAS-Chrimson:mVenus*  
820 *75C02-lexA lexAop-Shi<sup>ts1</sup>* (ii, iv and vi).



821

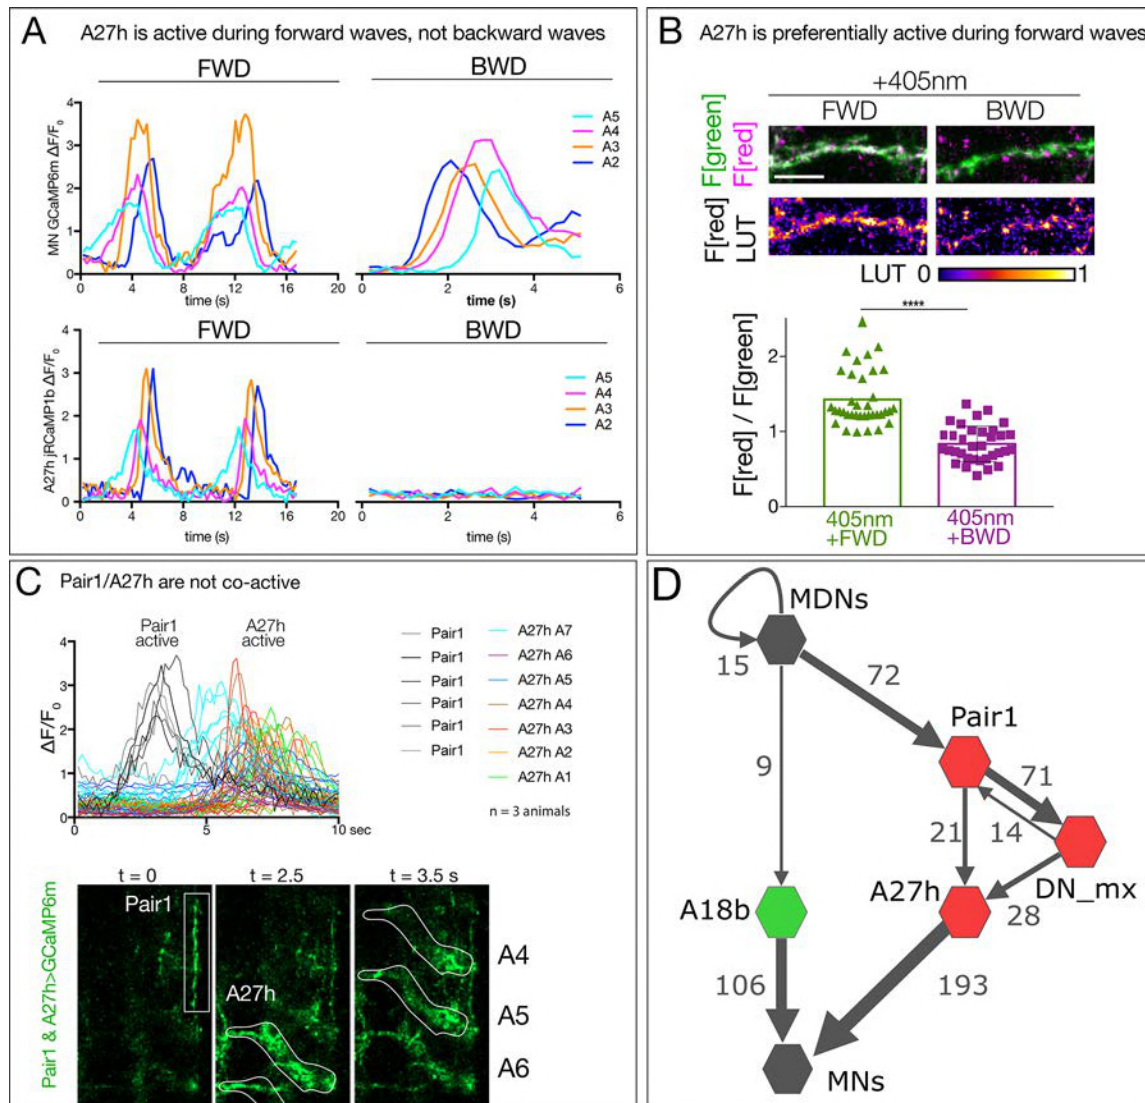

822

823

824 **Supplement to Figure 7. Timing of A27h neuronal activity.**

825 (A) A27h is active during forward (FWD) but not backward (BWD) motor waves in fictive preparations. A27h

826 expresses jRCaMP1b and U1-U5 motor neurons express GCaMP6m. Genotype: *CQ-lexA/+ ; lexAop-*

827 *GCaMP6m/R36G02-Gal4,UAS-jRCaMP1b*

828 (B) A27h is preferentially active during forward locomotion in the intact animal. CaMPARI in A27h neurites of a third

829 instar larval CNS. Top, fluorescence emission following 488nm (green) or 561nm (red) illumination. Bottom, graph

830 represents quantification of red fluorescence over green fluorescence mean intensity. Each value represents data

831 from an individual axon. n= 17 for FWD and 16 for BWD. Scale bar, 10  $\mu$ m. Genotype: *R36G02-Gal4 UAS-CaMPARI*.

832 (C) Pair1 and A27h are not co-active. GCaMP6m fluorescence was measured in distinct ROIs for Pair1 and A27h

833 (bottom panels). Traces show six Pair1 neurons (gray lines) and 42 A27h neurons from segments A1-A7 from three

834 animals (colored lines). Note that forward waves of A27h activity follow but don't overlap with the time of Pair1

835 activity. Genotype: *R75C02-Gal4/R36G02-Gal4, UAS-GCaMP6m*.

836 (D) There is no direct anatomical connection between A27h and A18b pathways. Neurons with one or more synapse

837 in the TEM reconstruction are shown (numbers next to arrows).

838

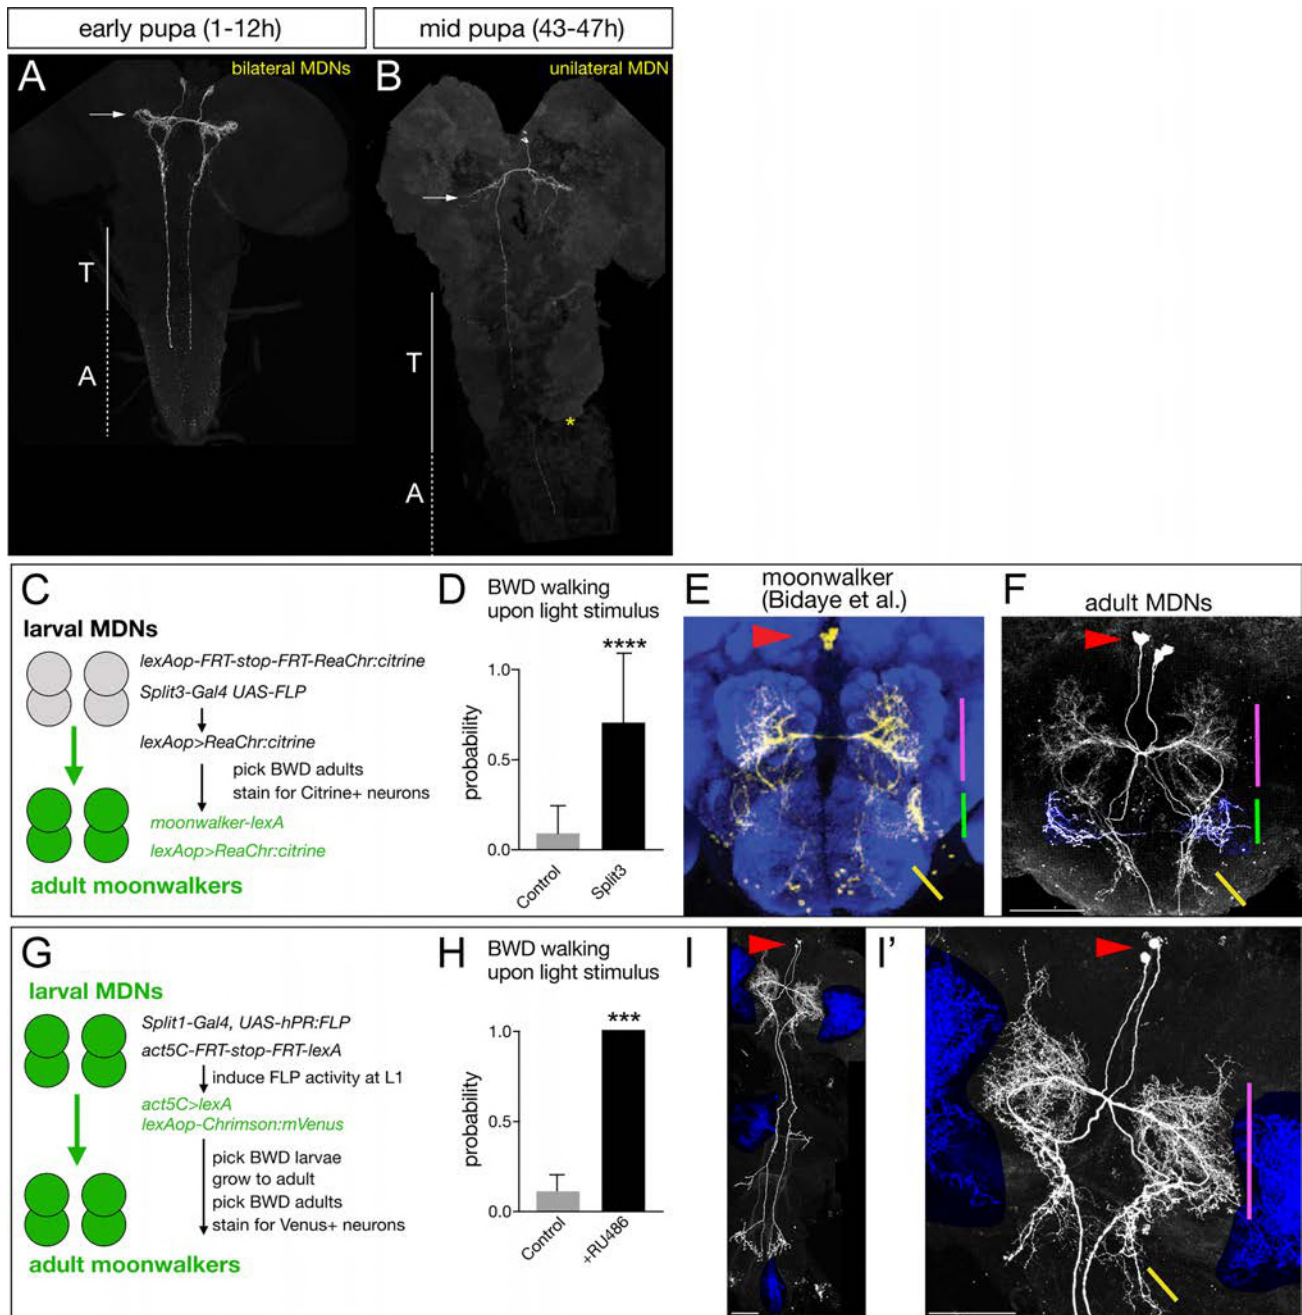

Figure 8

839

840 **Figure 8. Larval MDNs persist into adulthood, match the moonwalker neuron morphology, and induce backward**  
841 **walking**  
842 (A-B) MDN neurons labeled by Split1 MCFO are similar in morphology to larval neurons during early pupal stages (A),  
843 but prune their brain and SEZ arbors by mid-pupal stages (B, arrow). T, thoracic segments; A, abdominal segments.  
844 Asterisk, tissue damage from dissection.  
845 (C-F) Larval MDNs persist to adulthood, match adult moonwalker morphology, and can induce backward walking in  
846 adults. (C) Genetic scheme for the experiment. (D) Probability of adult backward walking upon light activation of  
847 Split3 immortalized neurons (*split3*) or controls lacking the DBD half of Split3 genotype (control). (E) Adult  
848 moonwalker neurons from Bidaye et al., 2014. Red arrowhead, cell bodies; colored lines, distinctive arbors. (F) One  
849 example of ‘immortalized’ larval MDNs showing the same cell body location (red arrowhead) and same distinctive  
850 arbors (colored lines); however, we find that the arbor marked by the green line is an off-target projection not  
851 connected to the MDN neurons. Genotypes: Control: *UAS-FLP.PEST ss01613-(AD)-Gal4/TM3 VT044845-lexA lexAop-*  
852 *FRT-stop-FRT-ReaChr:citrine*. Split3: *UAS-FLP.PEST ss01613-(AD+DBD)-Gal4 VT044845-lexA lexAop-FRT-stop-FRT-*  
853 *ReaChr:citrine*.  
854 (G-I) Larval MDNs persist to adulthood and induce backward walking. (G) Intersectional genetics used in this experiment.  
855 (H) Probability of adult backward walking upon light activation of the neurons immortalized by RU486-induced Flp  
856 activity (RU486+) or controls not given RU486 and thus lacking Chrimson expression in adult MDNs (control). (I) One  
857 example of an adult CNS plus VNC showing two MDNs (arrowhead) and four off target neurons (blue shading). (I')  
858 Enlargement of brain showing MDNs and parts of two off target neurons (blue shading). Red arrowhead, cell bodies;  
859 colored lines, distinctive arbors in the protocerebrum (magenta line) and SEZ (green line).  
860 Scale bars, 50  $\mu$ m.

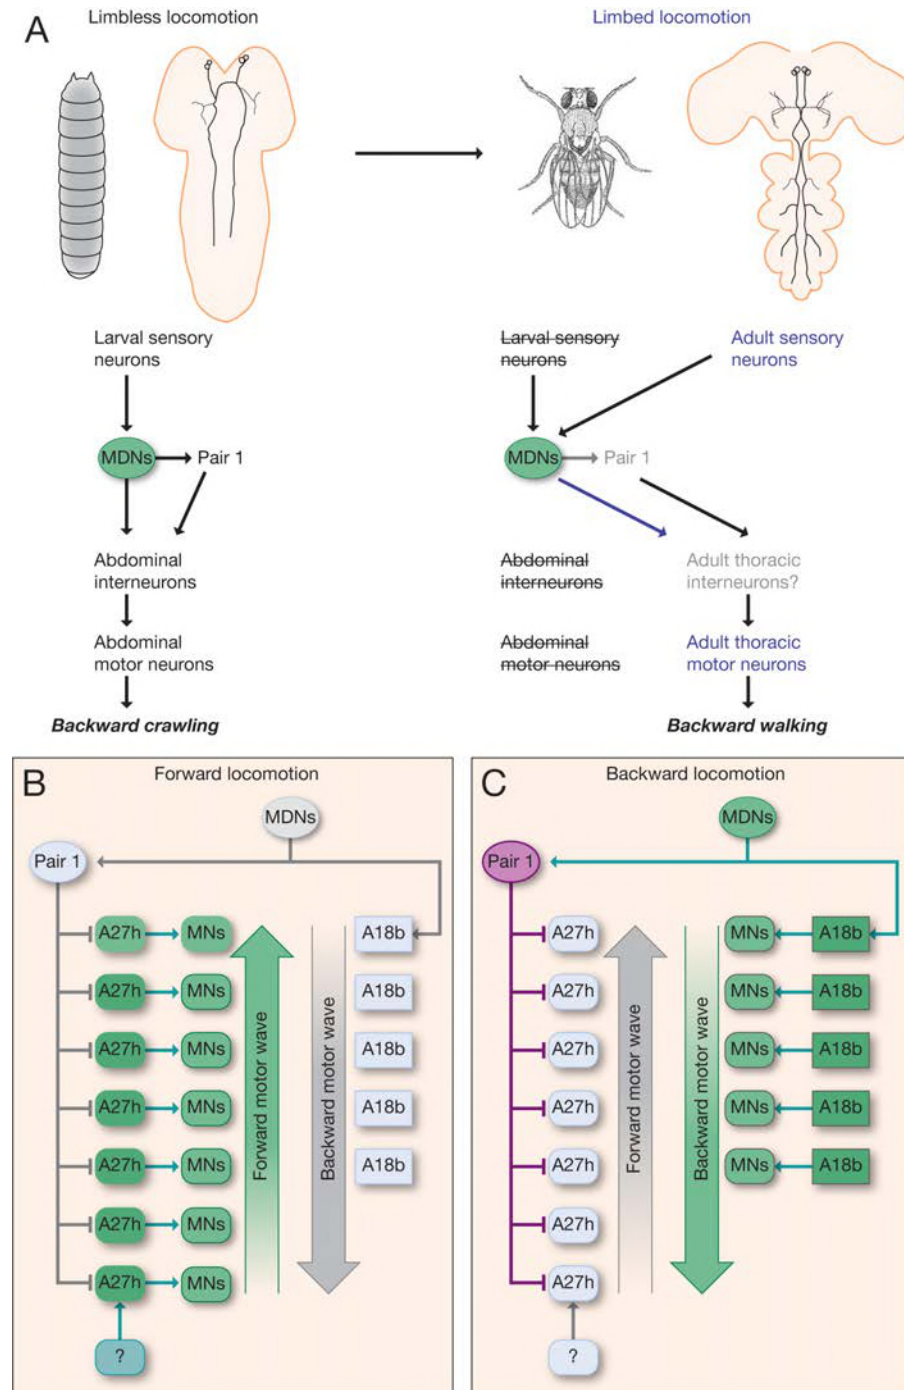

861  
862  
863  
864  
865  
866  
867  
868  
869  
870  
871

**Figure 9. Model describing the MDN-mediated backward crawling.**

(A) MDN neurons are present in larval stages where they promote backward peristaltic crawling via abdominal premotor and motor neurons; MDNs subsequently persist into the adult fly where they promote backward walking of the six-limbed adult fly, using a different pool of thoracic motor neurons.

(B,C) Model. (B) During forward locomotion the MDNs, Pair1 and A18b are silent; an unknown neuron (?) may initiate forward locomotion. (C) During backward locomotion the MDNs are activated which in turn activates Pair1 descending neuron. Pair1 activity inhibits the forward-active A27h premotor neuron to halt forward locomotion, and activates the backward-active A18b premotor neuron to initiate a backward motor wave.

872 **Movie 1a,b. MDN activation induces backward larval locomotion.**

873 Crawling behavior of third instar larvae expressing Chrimson in MDNs (Split1>Chrimson:mVenus) with ATR (a) or  
874 without ATR (b). During the first 15 seconds, the animals are not under optogenetic light followed by 15 seconds  
875 under 0.5 mW/mm<sup>2</sup> of green light.

876

877 **Movie 2a,b. Pair1 activation blocks forward locomotion.**

878 Crawling behavior of third instar larvae expressing Chrimson in Pair1 (75C02>Chrimson:mVenus) with ATR (a) or  
879 without ATR (b). During the first 10 seconds, the animals are not under optogenetic light followed by 10 seconds  
880 under 0.28 mW/mm<sup>2</sup> of green light.

881

882 **Movie 3. Larval MDNs persist into adulthood and induce backward walking.**

883 Walking behavior of adult flies carrying all the components showed in 8F (split3, right) or all the genetic components  
884 except the DBD half of Split3 (control, left). During the first 10 seconds, the animals are not under optogenetic light  
885 followed by 10 seconds under 0.28 mW/mm<sup>2</sup> of red light.

886

887 **Supplemental File 1. Graph view of the MDN and downstream neurons.**

888 File can be opened in CATMAID using the graph widget.

889

## 890 References

- 891
- 892
- 893 Bainbridge, S.P., and M. Bownes. 1981. Staging the metamorphosis of *Drosophila melanogaster*. *J*
- 894 *Embryol Exp Morphol*. 66:57-80.
- 895 Berni, J. 2015. Genetic Dissection of a Regionally Differentiated Network for Exploratory Behavior
- 896 in *Drosophila* Larvae. *Current biology : CB*. 25:1319-1326.
- 897 Berni, J., S.R. Pulver, L.C. Griffith, and M. Bate. 2012. Autonomous circuitry for substrate
- 898 exploration in freely moving *Drosophila* larvae. *Current biology : CB*. 22:1861-1870.
- 899 Bidaye, S.S., C. Machacek, Y. Wu, and B.J. Dickson. 2014. Neuronal control of *Drosophila* walking
- 900 direction. *Science (New York, N.Y.)*. 344:97-101.
- 901 Bouvier, J., V. Caggiano, R. Leiras, V. Caldeira, C. Bellardita, K. Balueva, A. Fuchs, and O. Kiehn.
- 902 2015. Descending Command Neurons in the Brainstem that Halt Locomotion. *Cell*.
- 903 163:1191-1203.
- 904 Clark, M.Q., S.J. McCumsey, S. Lopez-Darwin, E.S. Heckscher, and C.Q. Doe. 2016. Functional
- 905 Genetic Screen to Identify Interneurons Governing Behaviorally Distinct Aspects of
- 906 *Drosophila* Larval Motor Programs. *G3 (Bethesda)*. 6:2023-2031.
- 907 Clark, M.Q., A.A. Zarin, A. Carreira-Rosario, and C.Q. Doe. 2018. Neural circuits driving larval
- 908 locomotion in *Drosophila*. *Neural development*. 13:6.
- 909 Dolan, M.-J., H. Luan, W.C. Shropshire, B. Sutcliffe, B. Cocanougher, R.L. Scott, S. Frechter, M.
- 910 Zlatic, G.S.X.E. Jefferis, and B.H. White. 2017. Facilitating Neuron-Specific Genetic
- 911 Manipulations in *Drosophila melanogaster* Using a Split GAL4 Repressor. *Genetics*. 206.
- 912 Dubuc, R., F. Brocard, M. Antri, K. Fenelon, J.F. Gariépy, R. Smetana, A. Menard, D. Le Ray, G.
- 913 Viana Di Prisco, E. Pearlstein, M.G. Sirota, D. Derjean, M. St-Pierre, B. Zielinski, F.
- 914 Auclair, and D. Veilleux. 2008. Initiation of locomotion in lampreys. *Brain Res Rev*. 57:172-
- 915 182.
- 916 Fosque, B.F., Y. Sun, H. Dana, C.T. Yang, T. Ohyama, M.R. Tadross, R. Patel, M. Zlatic, D.S. Kim,
- 917 M.B. Ahrens, V. Jayaraman, L.L. Looger, and E.R. Schreiter. 2015. Neural circuits. Labeling
- 918 of active neural circuits in vivo with designed calcium integrators. *Science*. 347:755-760.
- 919 Fushiki, A., H. Kohsaka, and A. Nose. 2013. Role of sensory experience in functional development
- 920 of *Drosophila* motor circuits. *PLoS One*. 8:e62199.
- 921 Fushiki, A., M.F. Zwart, H. Kohsaka, R.D. Fetter, A. Cardona, and A. Nose. 2016. A circuit
- 922 mechanism for the propagation of waves of muscle contraction in *Drosophila*. *eLife*. 5.
- 923 Grillner, S., and A. El Manira. 2015. The intrinsic operation of the networks that make us locomote.
- 924 *Curr Opin Neurobiol*. 31:244-249.
- 925 Hagglund, M., L. Borgius, K.J. Dougherty, and O. Kiehn. 2010. Activation of groups of excitatory
- 926 neurons in the mammalian spinal cord or hindbrain evokes locomotion. *Nat Neurosci*.
- 927 13:246-252.
- 928 Hampel, S., R. Franconville, J.H. Simpson, and A.M. Seeds. 2015. A neural command circuit for
- 929 grooming movement control. *The Journal of Neuroscience*. 4:8079-8091.
- 930 Harris, R.M., B.D. Pfeiffer, G.M. Rubin, and J.W. Truman. 2015. Neuron hemilineages provide the
- 931 functional ground plan for the *Drosophila* ventral nervous system. *eLife*. 4.
- 932 Heckscher, E.S., S.R. Lockery, and C.Q. Doe. 2012. Characterization of *Drosophila* larval crawling
- 933 at the level of organism, segment, and somatic body wall musculature. *The Journal of*
- 934 *neuroscience : the official journal of the Society for Neuroscience*. 32:12460-12471.
- 935 Heckscher, E.S., A.A. Zarin, S. Faumont, M.Q. Clark, L. Manning, A. Fushiki, C.M. Schneider-
- 936 Mizell, R.D. Fetter, J.W. Truman, M.F. Zwart, M. Landgraf, A. Cardona, S.R. Lockery, and

- 937 C.Q. Doe. 2015. Even-Skipped(+) Interneurons Are Core Components of a Sensorimotor  
938 Circuit that Maintains Left-Right Symmetric Muscle Contraction Amplitude. *Neuron*.  
939 88:314-329.
- 940 Hedwig, B. 2000. Control of cricket stridulation by a command neuron: efficacy depends on the  
941 behavioral state. *Journal of neurophysiology*. 83:712-722.
- 942 Hückesfeld, S., A. Schoofs, P. Schlegel, A. Miroshnikow, and M.J. Pankratz. 2015. Localization of  
943 motor neurons and central pattern generators for motor patterns underlying feeding behavior  
944 in drosophila larvae. *PLoS ONE*. 10.
- 945 Hughes, C.L., and J.B. Thomas. 2007. A sensory feedback circuit coordinates muscle activity in  
946 Drosophila. *Mol Cell Neurosci*. 35:383-396.
- 947 Jordan, L.M., J. Liu, P.B. Hedlund, T. Akay, and K.G. Pearson. 2008. Descending command  
948 systems for the initiation of locomotion in mammals. *Brain Research Reviews*. 57:183-191.
- 949 Juvin, L., S. Gratsch, E. Trillaud-Doppia, J.F. Gariépy, A. Buschges, and R. Dubuc. 2016. A  
950 Specific Population of Reticulospinal Neurons Controls the Termination of Locomotion. *Cell*  
951 *Rep*. 15:2377-2386.
- 952 Kallman, B.R., H. Kim, and K. Scott. 2015. Excitation and inhibition onto central courtship neurons  
953 biases Drosophila mate choice. *eLife*. 4:e11188.
- 954 Kendroud, S., A.A. Bohra, P.A. Kuert, B. Nguyen, O. Guillermin, S.G. Sprecher, H. Reichert, K.  
955 VijayRaghavan, and V. Hartenstein. 2018. Structure and development of the subesophageal  
956 zone of the Drosophila brain. II. Sensory compartments. *The Journal of comparative*  
957 *neurology*. 526:33-58.
- 958 Kernan, M., D. Cowan, and C. Zuker. 1994. Genetic dissection of mechanosensory transduction:  
959 mechanoreception-defective mutations of Drosophila. *Neuron*. 12:1195-1206.
- 960 Kernan, M.J. 2007. Mechanotransduction and auditory transduction in Drosophila. *Pflugers Arch*.  
961 454:703-720.
- 962 Kimura, Y., C. Satou, S. Fujioka, W. Shoji, K. Umeda, T. Ishizuka, H. Yawo, and S. Higashijima.  
963 2013. Hindbrain V2a neurons in the excitation of spinal locomotor circuits during zebrafish  
964 swimming. *Curr Biol*. 23:843-849.
- 965 King, D.G., and R.J. Wyman. 1980. Anatomy of the giant fibre pathway in Drosophila. I. Three  
966 thoracic components of the pathway. *J Neurocytol*. 9:753-770.
- 967 Koyama, M., F. Minale, J. Shum, N. Nishimura, C.B. Schaffer, and J.R. Fetcho. 2016. A circuit  
968 motif in the zebrafish hindbrain for a two alternative behavioral choice to turn left or right.  
969 *eLife*. 5.
- 970 Kristan, W.B. 2008. Neuronal decision-making circuits. *Current biology : CB*. 18:R928-932.
- 971 Landgraf, M., V. Jeffrey, M. Fujioka, J.B. Jaynes, and M. Bate. 2003. Embryonic origins of a motor  
972 system: motor dendrites form a myotopic map in Drosophila. *PLoS Biol*. 1:E41.
- 973 Landgraf, M., and S. Thor. 2006. Development of Drosophila motoneurons: Specification and  
974 morphology. *Seminars in Cell & Developmental Biology*. 17:3-11.
- 975 Lindsay, T.H., T.R. Thiele, and S.R. Lockery. 2011. Optogenetic analysis of synaptic transmission in  
976 the central nervous system of the nematode *Caenorhabditis elegans*. *Nature communications*.  
977 2:306.
- 978 Liu, K.S., and J.R. Fetcho. 1999. Laser ablations reveal functional relationships of segmental  
979 hindbrain neurons in zebrafish. *Neuron*. 23:325-335.
- 980 Luan, H., N.C. Peabody, C.R. Vinson, and B.H. White. 2006. Refined spatial manipulation of  
981 neuronal function by combinatorial restriction of transgene expression. *Neuron*. 52:425-436.

- 982 Medan, V., and T. Preuss. 2014. The Mauthner-cell circuit of fish as a model system for startle  
983 plasticity. *J Physiol Paris*. 108:129-140.
- 984 Mohammad, F., J.C. Stewart, S. Ott, K. Chlebikova, J.Y. Chua, T.-W. Koh, J. Ho, and A. Claridge-  
985 Chang. 2017. Optogenetic inhibition of behavior with anion channelrhodopsins. *Nature*  
986 *Methods*. 14.
- 987 Nern, A., B.D. Pfeiffer, and G.M. Rubin. 2015. Optimized tools for multicolor stochastic labeling  
988 reveal diverse stereotyped cell arrangements in the fly visual system. *Proceedings of the*  
989 *National Academy of Sciences of the United States of America*. 112:E2967-2976.
- 990 Ohyama, T., C.M. Schneider-Mizell, R.D. Fetter, J.V. Aleman, R. Franconville, M. Rivera-Alba,  
991 B.D. Mensh, K.M. Branson, J.H. Simpson, J.W. Truman, A. Cardona, and M. Zlatic. 2015. A  
992 multilevel multimodal circuit enhances action selection in *Drosophila*. *Nature*. 520:633-639.
- 993 Pearson, K.G., D.N. Reye, D.W. Parsons, and G. Bicker. 1985. Flight-initiating interneurons in the  
994 locust. *Journal of neurophysiology*. 53:910-925.
- 995 Pfeiffer, B.D., A. Jenett, A.S. Hammonds, T.-T.B. Ngo, S. Misra, C. Murphy, A. Scully, J.W.  
996 Carlson, K.H. Wan, T.R. Laverty, C. Mungall, R. Svirskas, J.T. Kadonaga, C.Q. Doe, M.B.  
997 Eisen, S.E. Celniker, and G.M. Rubin. 2008. Tools for neuroanatomy and neurogenetics in  
998 *Drosophila*. *Proceedings of the National Academy of Sciences of the United States of*  
999 *America*. 105:9715-9720.
- 1000 Piggott, B.J., J. Liu, Z. Feng, S.A. Wescott, and X.Z. Xu. 2011. The neural circuits and synaptic  
1001 mechanisms underlying motor initiation in *C. elegans*. *Cell*. 147:922-933.
- 1002 Pulver, S.R., T.G. Bayley, A.L. Taylor, J. Berni, M. Bate, and B. Hedwig. 2015. Imaging fictive  
1003 locomotor patterns in larval *Drosophila*. *Journal of neurophysiology*. 114:2564-2577.
- 1004 Rickert, C., T. Kunz, K.-L. Harris, P.M. Whittington, and G.M. Technau. 2011. Morphological  
1005 characterization of the entire interneuron population reveals principles of neuromere  
1006 organization in the ventral nerve cord of *Drosophila*. *The Journal of neuroscience : the*  
1007 *official journal of the Society for Neuroscience*. 31:15870-15883.
- 1008 Roberts, A., W.C. Li, S.R. Soffe, and E. Wolf. 2008. Origin of excitatory drive to a spinal locomotor  
1009 network. *Brain Res Rev*. 57:22-28.
- 1010 Roberts, W.M., S.B. Augustine, K.J. Lawton, T.H. Lindsay, T.R. Thiele, E.J. Izquierdo, S. Faumont,  
1011 R.A. Lindsay, M.C. Britton, N. Pokala, C.I. Bargmann, and S.R. Lockery. 2016. A stochastic  
1012 neuronal model predicts random search behaviors at multiple spatial scales in *C. elegans*.  
1013 *eLife*. 5.
- 1014 Robertson, J.L., A. Tsubouchi, and W.D. Tracey. 2013. Larval Defense against Attack from  
1015 Parasitoid Wasps Requires Nociceptive Neurons. *PLOS ONE*. 8:e78704.
- 1016 Schneider-Mizell, C.M., S. Gerhard, M. Longair, T. Kazimiers, F. Li, M.F. Zwart, A. Champion,  
1017 F.M. Midgley, R.D. Fetter, S. Saalfeld, and A. Cardona. 2016. Quantitative neuroanatomy  
1018 for connectomics in *Drosophila*. *eLife*. 5.
- 1019 Sen, R., M. Wu, K. Branson, A. Robie, G.M. Rubin, and B.J. Dickson. 2017. Moonwalker  
1020 Descending Neurons Mediate Visually Evoked Retreat in *Drosophila*. *Current Biology*.  
1021 27:766-771.
- 1022 Takagi, S., B.T. Cocanougher, S. Niki, D. Miyamoto, H. Kohsaka, H. Kazama, R.D. Fetter, J.W.  
1023 Truman, M. Zlatic, A. Cardona, and A. Nose. 2017. Divergent Connectivity of Homologous  
1024 Command-like Neurons Mediates Segment-Specific Touch Responses in *Drosophila*.  
1025 *Neuron*. 96:1373-1387.e1376.
- 1026 Tanouye, M.A., and R.J. Wyman. 1980. Motor outputs of giant nerve fiber in *Drosophila*. *Journal of*  
1027 *neurophysiology*. 44:405-421.



- 1028 Titlow, J.S., J. Rice, Z.R. Majeed, E. Holsopple, S. Biecker, and R.L. Cooper. 2014. Anatomical and  
1029 genotype-specific mechanosensory responses in *Drosophila melanogaster* larvae.  
1030 *Neuroscience research*. 83:54-63.
- 1031 Tracey, W.D., Jr., R.I. Wilson, G. Laurent, and S. Benzer. 2003. painless, a *Drosophila* gene  
1032 essential for nociception. *Cell*. 113:261-273.
- 1033 Vogelstein, J.T., Y. Park, T. Ohyama, R.A. Kerr, J.W. Truman, C.E. Priebe, and M. Zlatic. 2014.  
1034 Discovery of Brainwide Neural-Behavioral Maps via Multiscale Unsupervised Structure  
1035 Learning. *Science*. 344:386-392.
- 1036 von Philipsborn, A.C., T. Liu, J.Y. Yu, C. Masser, S.S. Bidaye, and B.J. Dickson. 2011. Neuronal  
1037 control of *Drosophila* courtship song. *Neuron*. 69:509-522.
- 1038 Weber, F., S. Chung, K.T. Beier, M. Xu, L. Luo, and Y. Dan. 2015. Control of REM sleep by ventral  
1039 medulla GABAergic neurons. *Nature*. 526:435-438.
- 1040 Wu, C.L., T.F. Fu, Y.Y. Chou, and S.R. Yeh. 2015. A single pair of neurons modulates egg-laying  
1041 decisions in *Drosophila*. *PLoS One*. 10:e0121335.
- 1042 Zwart, M.F., S.R. Pulver, J.W. Truman, A. Fushiki, R.D. Fetter, A. Cardona, and M. Landgraf. 2016.  
1043 Selective Inhibition Mediates the Sequential Recruitment of Motor Pools. *Neuron*. 91:615-  
1044 628.  
1045
